# Supplementary material
Source: publisher figshare collection journal article supplement (https://acs.figshare.com/ndownloader/files/4631542)

## Supporting Information

### Camphor Sulfonyl Hydrazines (CaSH) as Organocatalysts in Enantioselective Diels-Alder Reactions

Hao He, Bao-Jian Pei, Ho-Hsuan Chou, Tian Tian, W. H. Chan, and Albert W. M. Lee

*Department of Chemistry, Hong Kong Baptist University,  
Kowloon Tong, Hong Kong SAR, China*

## Contents

|                                                      |     |
|------------------------------------------------------|-----|
| General Methods and Materials                        | S1  |
| Experimental Procedures and Characterizations        | S2  |
| Refernce                                             | S17 |
| Selected HPLC chromatograms of compounds of Tables 4 | S18 |
| Selected NMR spectra of Table 3 and Table 4          | S21 |

**General Methods.** Unless otherwise noted, solvents and starting materials were obtained from commercial suppliers. All chemicals used were of reagent grade without further purification before use.  $^1\text{H}$  NMR and  $^{13}\text{C}$  NMR spectra were recorded on a Varian INOVA Unity (400 MHz for  $^1\text{H}$ , and 100 MHz for  $^{13}\text{C}$ ) in  $\text{CDCl}_3$ . Chemical shifts were recorded in ppm ( $\delta$ ) relative to  $\text{CHCl}_3$  on 7.26 for  $^1\text{H}$  NMR, 77.0 for  $^{13}\text{C}$  NMR. Optical rotations were taken on a JASCO DIP-1000 digital polarimeter. FT-IR was recorded on a PerkinElmer Spectrum 100 FT/IR spectrometer. High resolution mass spectra (HRMS) were recorded on a QSTAR Pulsar/LC/MS/MS System, ESI-QTOF instrument (Applied Biosystem) or Bruker Autoflex MALDI-TOF MS instrument. HPLC analysis was performed on a Hewlett Packard Series 1050 HPLC, UV detection monitored at 230 nm, using Chiralcel OD (0.46 cm  $\times$  25 cm), Chiralcel OD Guard (0.46  $\times$  5 cm), Chiralcel OD-H (0.46 cm  $\times$  15 cm), and Chiralpak AD-H (0.46 cm  $\times$  25 cm).

## Experimental Procedures and Characterizations.

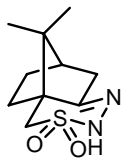

**2**

### (S)-(-)-Cyclic camphor sulfonyl hydrazone (2)

To a solution of (1S)-(+)-10-Camphorsulfonyl chloride **1** (2.5 g, 10 mmol) in 20 ml of methanol was added hydrazine monohydrate (0.97 ml, 20 mmol) and acetic acid (0.29 ml, 5 mmol). The mixture was stirred at 80 °C to reflux for 4 hours. The reaction was cooled down. After remove the organic solvent by evaporator, the resulting mixture was dissolved in small amount of water and extracted with ethyl acetate for three times. The aqueous phase was basified by NaOH pellets to PH=9-10 and extracted with ethyl acetate for another three times. The combined six times extracting organic layer was washed with brine and dried with anhydrous Na<sub>2</sub>SO<sub>4</sub>, followed by filtration and concentration to obtain 2.1 g white solid of cyclic camphor sulfonyl hydrazone **2** in 92% yield. Mp 183-185 °C; [ $\alpha$ ]<sup>20</sup><sub>D</sub> = -13.1 (c = 1.03, CHCl<sub>3</sub>); IR (neat) 3253, 2974, 1319, 1164 cm<sup>-1</sup>; <sup>1</sup>H NMR (400 MHz, CDCl<sub>3</sub>)  $\delta$  7.73 (s, 1H), 3.24-3.12 (m, 2H), 2.58-2.52 (m, 1H), 2.40-2.33 (m, 1H), 2.06-2.01 (m, 2H), 1.98-1.91 (m, 1H), 1.81-1.74 (m, 1H), 1.42-1.36 (m, 1H), 0.98 (s, 3H), 0.90 (s, 3H); <sup>13</sup>C NMR (100 MHz, CDCl<sub>3</sub>)  $\delta$  165.1, 55.9, 49.2, 48.0, 44.2, 36.0, 31.0, 26.9, 19.8, 17.9; HRMS (ESI) C<sub>10</sub>H<sub>17</sub>N<sub>2</sub>O<sub>2</sub>S (M+H)<sup>+</sup> calcd. 229.1010, found 229.1000.

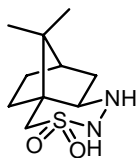

**4**

### (S)-(-)-Cyclic camphor sulfonyl hydrazine (4)

To a solution of cyclic camphor sulfonyl hydrazone **2** (228 mg, 1 mmol) in 3 ml of methanol was added 1.5 ml of acetic acid, followed by adding NaCNBH<sub>3</sub> dropwise. The reaction was stirred at room temperature for 8 hours by the consumption of starting material. The excess NaCNBH<sub>3</sub> was quenched by 4N aqueous HCl solution. After remove the organic solvent by evaporator, the resulting mixture was basified by NaOH pellets to PH=9-10 and extracted with ethyl acetate for three times. The combined organic layer was washed with brine and dried with anhydrous Na<sub>2</sub>SO<sub>4</sub>, followed by further purification via column chromatography to give 225 mg white solid of cyclic camphor sulfonyl hydrazine **4** in 98% yield.

Mp 179-181 °C;  $[\alpha]_D^{20} = -89.0$  ( $c = 1.04$ ,  $\text{CHCl}_3$ ); IR (neat) 3159, 2962, 1352, 1165  $\text{cm}^{-1}$ ;  $^1\text{H}$  NMR (400 MHz,  $\text{CDCl}_3$ )  $\delta$  5.63 (s, 1H), 4.10 (br, 1H), 3.36 (d,  $J = 14.8$  Hz, 1H), 3.12 (d,  $J = 14.8$  Hz, 1H), 3.08 (dd,  $J = 8.8, 4.8$  Hz, 1H), 1.83-1.80 (m, 1H), 1.77-1.70 (m, 2H), 1.64-1.57 (m, 2H), 1.34 (s, 3H), 1.27-1.21 (m, 1H), 1.18-1.11 (m, 1H), 0.95 (s, 3H);  $^{13}\text{C}$  NMR (100 MHz,  $\text{CDCl}_3$ )  $\delta$  63.0, 50.0, 49.6, 46.7, 45.6, 37.6, 34.0, 26.0, 21.1, 20.4; HRMS (MALDI-TOF)  $\text{C}_{10}\text{H}_{19}\text{N}_2\text{O}_2\text{S}$  ( $\text{M}+\text{H}$ ) $^+$  calcd. 231.1162, found 231.1176.

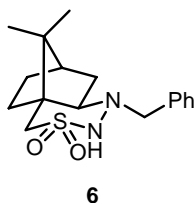

**(S)-(-)- $N^B$ -benzyl cyclic camphor sulfonyl hydrazine (6)** To a solution of cyclic camphor sulfonyl hydrazine **4** (230 mg, 1 mmol) in 5 ml of dichloromethane was added potassium carbonate (138 mg, 1 mmol), tetrabutylammonium bromide (32 mg, 0.1 mmol),

and followed by benzyl bromide (0.12 ml, 1 mmol). The reaction was stirred at room temperature for 2 days. Water was added and the resulting mixture was extracted by ethyl acetate for three times. The combined organic layer was washed with brine and dried with anhydrous  $\text{Na}_2\text{SO}_4$ , followed by further purification via column chromatography to give 212 mg white solid of **6** in 66% yield. Mp 187-189 °C;  $[\alpha]_D^{20} = -150.6$  ( $c = 1.005$ ,  $\text{CHCl}_3$ ); IR (neat) 3156, 2950, 1332, 1156  $\text{cm}^{-1}$ ;  $^1\text{H}$  NMR (400 MHz,  $\text{CDCl}_3$ )  $\delta$  7.36-7.26 (m, 5H), 4.74 (s, 1H), 4.09 (d,  $J = 14.8$  Hz, 1H), 3.69 (d,  $J = 14.8$  Hz, 1H), 3.29 (d,  $J = 14.8$  Hz, 1H), 2.91 (d,  $J = 15.2$  Hz, 1H), 2.53 (dd,  $J = 8.2, 5.0$  Hz, 1H), 1.99-1.94 (m, 1H), 1.85-1.83 (m, 1H), 1.78-1.66 (m, 2H), 1.63-1.56 (m, 1H), 1.41 (s, 3H), 1.27-1.12 (m, 2H), 0.94 (s, 3H);  $^{13}\text{C}$  NMR (100 MHz,  $\text{CDCl}_3$ )  $\delta$  134.3, 129.3, 128.4, 127.5, 68.4, 57.2, 50.2, 49.9, 47.1, 46.0, 37.5, 35.1, 26.6, 20.7, 20.4; HRMS (MALDI-TOF)  $\text{C}_{17}\text{H}_{25}\text{N}_2\text{O}_2\text{S}$  ( $\text{M}+\text{H}$ ) $^+$  calcd. 321.1631, found 321.1621.

**General procedure for preparation of  $N^a$ -acylated cyclic camphor sulfonyl hydrazines (7a-c)** To a solution of cyclic camphor sulfonyl hydrazine **4** (1 mmol) in 4 ml of dichloromethane was added 4-(Dimethylamino)pyridine (1.1 mmol). Acid anhydride or acid chloride (1.1 mmol) was then dropped into the stirring reaction

mixture at room temperature. After consumption of the starting material (tracked by TLC), the reaction mixture was put into ethyl acetate and washed with water and brine, dried with anhydrous  $\text{Na}_2\text{SO}_4$ , followed by further purification via column chromatography to give a white solid of **7a-c** in 95-99% yield.

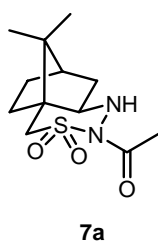

**(S)-(-)-*N*<sup>a</sup>-acetyl cyclic camphor sulfonyl hydrazines (7a)**

Prepared according to the general procedure with acetic anhydride to provide the title compound as a white solid in 95% yield; Mp 159-160 °C;  $[\alpha]_D^{20} = -33.0$  ( $c = 1.015$ ,  $\text{CHCl}_3$ ); IR (neat) 3287, 2955, 1683, 1347, 1252, 1166  $\text{cm}^{-1}$ ;  $^1\text{H}$  NMR (400 MHz,  $\text{CDCl}_3$ )  $\delta$  5.41 (d,  $J = 5.2$  Hz, 1H), 3.46 (d,  $J = 14.8$  Hz, 1H), 3.24 (d,  $J = 14.8$  Hz, 1H), 3.07-3.03 (m, 1H), 2.44 (s, 3H), 1.85-1.72 (m, 4H), 1.66-1.60 (m, 1H), 1.39 (s, 3H), 1.24-1.14 (m, 2H), 0.96 (s, 3H);  $^{13}\text{C}$  NMR (100 MHz,  $\text{CDCl}_3$ )  $\delta$  168.5, 63.2, 53.4, 50.9, 46.9, 45.3, 35.8, 33.8, 26.1, 23.7, 20.6, 20.3; HRMS (MALDI-TOF)  $\text{C}_{12}\text{H}_{20}\text{N}_2\text{NaO}_3\text{S}$  ( $\text{M}+\text{Na}$ )<sup>+</sup> calcd. 295.1087, found 295.1082.

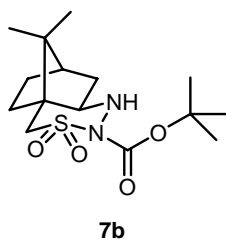

**(S)-(-)-*N*<sup>a</sup>-*t*-BOC cyclic camphor sulfonyl hydrazines (7b)**

Prepared according to the general procedure with di-*tert*-butyl dicarbonate to provide the title compound as a white solid in 99% yield; Mp 111-113 °C;  $[\alpha]_D^{20} = -51.5$  ( $c = 1.015$ ,  $\text{CHCl}_3$ ); IR (neat) 3347, 2947, 1737, 1360, 1298, 1177, 1139  $\text{cm}^{-1}$ ;  $^1\text{H}$  NMR (400 MHz,  $\text{CDCl}_3$ )  $\delta$  4.70 (d,  $J = 8.4$  Hz, 1H), 3.40 (d,  $J = 14.8$  Hz, 1H), 3.28 (d,  $J = 14.8$  Hz, 1H), 3.21-3.15 (m, 1H), 1.82-1.68 (m, 4H), 1.65-1.58 (m, 1H), 1.53 (s, 9H), 1.33 (s, 3H), 1.28-1.22 (m, 1H), 1.18-1.12 (m, 1H), 0.94 (s, 3H);  $^{13}\text{C}$  NMR (100 MHz,  $\text{CDCl}_3$ )  $\delta$  150.7, 84.8, 62.9, 52.6, 51.0, 46.9, 45.2, 36.0, 34.0, 27.9, 26.0, 20.8, 20.4; HRMS (ESI)  $\text{C}_{15}\text{H}_{27}\text{N}_2\text{O}_4\text{S}$  ( $\text{M}+\text{H}$ )<sup>+</sup> calcd. 331.1691, found 331.1685.

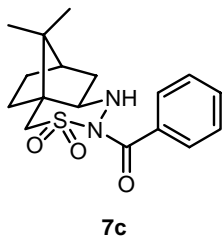

**(S)-(-)-*N*<sup>α</sup>-benzoyl cyclic camphor sulfonyl hydrazines (7c)**

Prepared according to the general procedure with benzoyl chloride to provide the title compound as a white solid in 99% yield; Mp 131-133 °C;  $[\alpha]_D^{20} = -67.6$  ( $c = 1.1$ ,  $\text{CHCl}_3$ ); IR (neat) 3330, 2964, 1677, 1362, 1171  $\text{cm}^{-1}$ ;  $^1\text{H}$  NMR (400 MHz,  $\text{CDCl}_3$ )

$\delta$  7.72-7.70 (m, 2H), 7.56-7.52 (m, 1H), 7.45-7.40 (m, 2H), 5.09 (d,  $J = 8.0$  Hz, 1H), 3.47 (d,  $J = 14.8$  Hz, 1H), 3.35 (d,  $J = 14.4$  Hz, 1H), 3.35 (dd,  $J = 21.6, 5.2$  Hz, 1H), 1.85-1.59 (m, 5H), 1.31 (s, 3H), 1.30-1.24 (m, 1H), 1.19-1.13 (m, 1H), 0.97 (s, 3H);  $^{13}\text{C}$  NMR (100 MHz,  $\text{CDCl}_3$ )  $\delta$  169.9, 133.4, 132.3, 129.2, 127.7, 62.5, 52.6, 50.6, 46.8, 45.3, 36.4, 34.0, 25.8, 21.0, 20.3; HRMS (MALDI-TOF)  $\text{C}_{17}\text{H}_{23}\text{N}_2\text{O}_3\text{S}$  ( $\text{M}+\text{H}$ )<sup>+</sup> calcd. 335.1424, found 335.1413.

**General procedure for preparation of *N*<sup>α</sup>-alkylated cyclic camphor sulfonyl hydrazones (3a-f)**

To a solution of cyclic camphor sulfonyl hydrazone **2** (5 mmol) in 20 ml THF was added sodium hydroxide (10 mmol) and tetrabutylammonium bromide (2 mmol), followed by alkyl halide (10 mmol). The reaction mixture was stirred at room temperature. After consumption of the starting material (tracked by TLC), water was added and THF was removed by evaporation. The resulting mixture was extracted by ethyl acetate for three times and the combined organic layer was washed with brine and dried with anhydrous  $\text{Na}_2\text{SO}_4$ , followed by further purification via column chromatography to give compound **3a-f** in 82-97% yield.

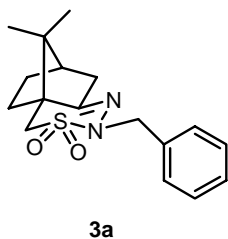

**(S)-(-)-*N*<sup>α</sup>-benzyl cyclic camphor sulfonyl hydrazone (3a)**

Prepared according to the general procedure with benzyl bromide to provide the title compound as a white solid in 97% yield; Mp 100-101 °C;  $[\alpha]_D^{20} = -77.2$  ( $c = 1.02$ ,  $\text{CHCl}_3$ ); IR (neat) 2971, 1323, 1145  $\text{cm}^{-1}$ ;  $^1\text{H}$  NMR (400 MHz,  $\text{CDCl}_3$ )  $\delta$  7.33-7.20

(m, 5H), 4.78 (d,  $J = 14.8$  Hz, 1H), 4.49 (d,  $J = 15.2$  Hz, 1H) 3.10 (d,  $J = 13.6$  Hz, 1H), 2.99 (d,  $J = 13.2$  Hz, 1H), 2.47-2.41 (m, 1H), 2.36-2.29 (m, 1H), 1.99-1.83 (m, 3H), 1.74-1.67 (m, 1H), 1.36-1.30 (m, 1H), 0.82 (s, 3H), 0.73 (s, 3H);  $^{13}\text{C}$  NMR (100 MHz,

CDCl<sub>3</sub>)  $\delta$  164.2, 136.4, 128.6, 128.3, 127.5, 55.9, 51.9, 49.0, 48.2, 44.1, 36.4, 30.9, 26.9, 19.5, 18.1; HRMS (ESI) C<sub>17</sub>H<sub>23</sub>N<sub>2</sub>O<sub>2</sub>S (M+H)<sup>+</sup> calcd. 319.1480, found 319.1490.

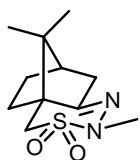

**(S)-(+)-N<sup>α</sup>-methyl cyclic camphor sulfonyl hydrazone (3b)**

Prepared according to the general procedure with methyl iodide to provide the title compound as a white solid in 92% yield; Mp 114-116

**3b** °C;  $[\alpha]_D^{20} = +84.7$  (c = 1.04, CHCl<sub>3</sub>); IR (neat) 2961, 1321, 1170 cm<sup>-1</sup>; <sup>1</sup>H NMR (400 MHz, CDCl<sub>3</sub>)  $\delta$  3.26 (d, *J* = 13.6 Hz, 1H), 3.14 (d, *J* = 13.6 Hz, 1H), 3.13 (s, 3H), 2.59-2.53 (m, 1H), 2.41-2.35 (m, 1H), 2.08-2.04 (m, 2H), 2.00-1.93 (m, 1H), 1.83-1.76 (m, 1H), 1.45-1.39 (m, 1H), 1.01 (s, 3H), 0.93 (s, 3H); <sup>13</sup>C NMR (100 MHz, CDCl<sub>3</sub>)  $\delta$  164.2, 56.5, 49.4, 48.2, 44.5, 36.7, 35.0, 31.5, 27.3, 20.2, 18.3; HRMS (ESI) C<sub>11</sub>H<sub>19</sub>N<sub>2</sub>O<sub>2</sub>S (M+H)<sup>+</sup> calcd. 243.1167, found 243.1168.

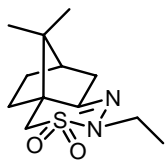

**(S)-(+)-N<sup>α</sup>-ethyl cyclic camphor sulfonyl hydrazone (3c)**

Prepared according to the general procedure with ethyl bromide to provide the title compound as a white solid in 94% yield; Mp 91-93

**3c** °C;  $[\alpha]_D^{20} = +33.7$  (c = 1.145, CHCl<sub>3</sub>); IR (neat) 2974, 1324, 1171 cm<sup>-1</sup>; <sup>1</sup>H NMR (400 MHz, CDCl<sub>3</sub>)  $\delta$  3.60-3.55 (m, 2H), 3.19 (d, *J* = 13.2 Hz, 1H), 3.12 (d, *J* = 13.2 Hz, 1H), 2.59-2.53 (m, 1H), 2.42-2.36 (m, 1H), 2.09-2.04 (m, 2H), 2.00-1.93 (m, 1H), 1.82-1.74 (m, 1H), 1.45-1.38 (m, 1H), 1.27 (t, *J* = 7.0 Hz, 3H), 0.99 (s, 3H), 0.92 (s, 3H); <sup>13</sup>C NMR (100 MHz, CDCl<sub>3</sub>)  $\delta$  163.7, 56.2, 49.3, 48.8, 44.5, 43.5, 36.7, 31.4, 27.3, 20.2, 18.3, 14.0; HRMS (ESI) C<sub>12</sub>H<sub>21</sub>N<sub>2</sub>O<sub>2</sub>S (M+H)<sup>+</sup> calcd. 257.1323, found 257.1319.

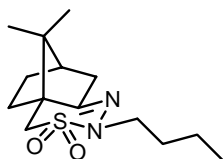

**(S)-(+)-N<sup>α</sup>-n-butyl cyclic camphor sulfonyl hydrazone (3d)**

Prepared according to the general procedure with *n*-butyl bromide to provide the title compound as a white solid in 91%

**3d** yield; Mp 66-67 °C;  $[\alpha]_D^{20} = +30.3$  (c = 1.055, CHCl<sub>3</sub>); IR (neat) 2948, 2872, 1325, 1161 cm<sup>-1</sup>; <sup>1</sup>H NMR (400 MHz, CDCl<sub>3</sub>)  $\delta$  3.55-3.40 (m, 2H), 3.19

(d,  $J = 13.2$  Hz, 1H), 3.12 (d,  $J = 13.2$  Hz, 1H), 2.58-2.52 (m, 1H), 2.41-2.34 (m, 1H), 2.08-2.03 (m, 2H), 2.00-1.91 (m, 1H), 1.81-1.74 (m, 1H), 1.71-1.63 (m, 2H), 1.44-1.29 (m, 3H), 0.99 (s, 3H), 0.92 (t,  $J = 7.4$  Hz, 3H), 0.91 (s, 3H);  $^{13}\text{C}$  NMR (100 MHz,  $\text{CDCl}_3$ )  $\delta$  163.4, 56.2, 49.3, 48.7, 48.1, 44.5, 36.7, 31.4, 30.6, 27.3, 20.2, 20.1, 18.3, 14.0; HRMS (ESI)  $\text{C}_{14}\text{H}_{25}\text{N}_2\text{O}_2\text{S}$  ( $\text{M}+\text{H}$ ) $^+$  calcd. 285.1636, found 285.1623.

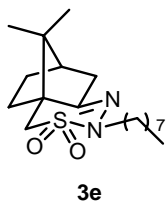

**(S)-(+)- $N^a$ -*n*-Octyl cyclic camphor sulfonyl hydrazone (3e)**

Prepared according to the general procedure with *n*-octyl bromide to provide the title compound as a colorless oil in 91% yield;  $[\alpha]_{\text{D}}^{20} = +22.6$  ( $c = 1.227$ ,  $\text{CHCl}_3$ ); IR (neat) 2923, 2855, 1331, 1166  $\text{cm}^{-1}$ ;  $^1\text{H}$  NMR (400 MHz,  $\text{CDCl}_3$ )  $\delta$  3.51-3.40 (m, 2H), 3.18 (d,  $J = 13.2$  Hz, 1H), 3.12 (d,  $J = 13.2$  Hz, 1H), 2.57-2.51 (m, 1H), 2.41-2.34 (m, 1H), 2.07-2.03 (m, 2H), 1.96-1.91 (m, 1H), 1.80-1.73 (m, 1H), 1.70-1.65 (m, 2H), 1.43-1.37 (m, 1H), 1.28-1.24 (m, 10H), 0.98 (s, 3H), 0.91 (s, 3H), 0.85 (t,  $J = 6.6$  Hz, 3H);  $^{13}\text{C}$  NMR (100 MHz,  $\text{CDCl}_3$ )  $\delta$  163.4, 56.1, 49.3, 48.7, 48.3, 44.5, 36.7, 32.0, 31.4, 29.4, 28.5, 27.3, 26.8, 22.8, 20.1, 18.3, 14.3; HRMS (ESI)  $\text{C}_{18}\text{H}_{33}\text{N}_2\text{O}_2\text{S}$  ( $\text{M}+\text{H}$ ) $^+$  calcd. 341.2262, found 341.2256.

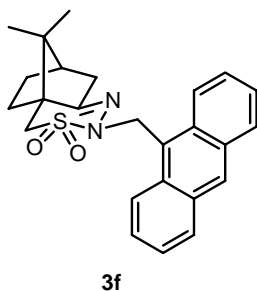

**(S)-(-)- $N^a$ -9-methyl anthryl cyclic camphor sulfonyl hydrazone (3f)**

Prepared according to the general procedure with 9-chloromethyl anthracene to provide the title compound as a yellow solid in 82% yield; Mp 196-198  $^{\circ}\text{C}$ ;  $[\alpha]_{\text{D}}^{20} = -45.0$  ( $c = 1.16$ ,  $\text{CHCl}_3$ ); IR (neat) 2967, 1322, 1164  $\text{cm}^{-1}$ ;  $^1\text{H}$  NMR (400 MHz,  $\text{CDCl}_3$ )  $\delta$  8.55 (d,  $J = 8.8$  Hz, 2H), 8.44 (s, 1H), 7.98 (d,  $J = 8.4$  Hz, 2H), 7.57-7.53 (m, 2H), 7.48-7.45 (m, 2H), 5.70 (d,  $J = 13.6$  Hz, 1H), 5.47 (d,  $J = 14.0$  Hz, 1H), 3.30 (d,  $J = 13.6$  Hz, 1H), 3.24 (d,  $J = 13.6$  Hz, 1H), 2.28-2.22 (m, 2H), 1.89-1.82 (m, 3H), 1.78-1.74 (m, 1H), 1.29-1.27 (m, 1H), 0.84 (s, 3H), 0.75 (s, 3H);  $^{13}\text{C}$  NMR (100 MHz,  $\text{CDCl}_3$ )  $\delta$  164.6, 131.8, 131.6, 129.0, 128.6, 127.0, 126.1, 125.2, 125.0, 56.0, 49.1, 48.8, 44.4, 43.0, 36.6, 31.6, 27.1, 20.0, 18.2; HRMS (MALDI-TOF)  $\text{C}_{25}\text{H}_{26}\text{N}_2\text{NaO}_2\text{S}$  ( $\text{M}+\text{Na}$ ) $^+$  calcd. 441.1607, found 441.1594.

**General procedure for preparation of *N*<sup>α</sup>-alkylated cyclic camphor sulfonyl hydrazines (5a-f)**

To a solution of **3a-f** (1 mmol) in 2 ml methanol was added 2ml trifluoroacetic acid. The mixture was stirred at 0 °C and Sodium cyanoborohydride was added in portions. The reaction was then allowed to stir at room temperature. After consumption of the starting material (tracked by TLC), methanol was removed by evaporator. Water was added to the resulting mixture and use sodium hydroxide pellets to basify the solution to PH=9-10. Then the mixture was extracted with ethyl acetate for three times. The combined organic layer was washed with brine and dried with anhydrous Na<sub>2</sub>SO<sub>4</sub>, followed by further purification via column chromatography to give compound **5a-f** in 25-96% yield.

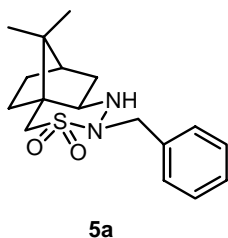

**(S)-(-)-*N*<sup>α</sup>-Benzyl cyclic camphor sulfonyl hydrazine (5a)**

Prepared according to the general procedure with **3a** to provide the title compound as a white solid in 80% yield; Mp 69-70 °C;  $[\alpha]_D^{20} = -87.4$  (*c* = 1.1, CHCl<sub>3</sub>); IR (neat) 3359, 2958, 2881, 1324, 1143 cm<sup>-1</sup>; <sup>1</sup>H NMR (400 MHz, CDCl<sub>3</sub>) δ 7.39-7.29 (m, 5H), 4.58 (d, *J* = 14.8 Hz, 1H), 4.06 (d, *J* = 14.8 Hz, 1H), 3.31 (d, *J* = 14.4 Hz, 1H), 3.22 (d, *J* = 14.4 Hz, 1H), 3.16 (dd, *J* = 8.8, 5.6 Hz, 1H), 1.76-1.51 (m, 5H), 1.32 (s, 3H), 1.23-1.17 (m, 1H), 1.13-1.07 (m, 1H), 0.94 (s, 3H); <sup>13</sup>C NMR (100 MHz, CDCl<sub>3</sub>) δ 136.0, 128.6, 128.4, 127.6, 62.5, 51.3, 50.7, 50.4, 46.7, 45.2, 37.2, 34.2, 25.9, 21.1, 20.6; HRMS (MALDI-TOF) C<sub>17</sub>H<sub>25</sub>N<sub>2</sub>O<sub>2</sub>S (M+H)<sup>+</sup> calcd. 321.1631, found 321.1628.

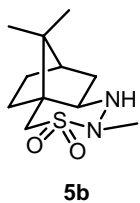

**(S)-(-)-*N*<sup>α</sup>-Methyl cyclic camphor sulfonyl hydrazine (5b)**

Prepared according to the general procedure with **3b** to provide the title compound as a white solid in 82% yield; Mp 81-83 °C;  $[\alpha]_D^{20} = -78.8$  (*c* = 1.05, CHCl<sub>3</sub>); IR (neat) 3294, 2961, 2880, 1334, 1145 cm<sup>-1</sup>; <sup>1</sup>H NMR (400 MHz, CDCl<sub>3</sub>) δ 3.31 (dd, *J* = 9.4, 5.8 Hz, 1H), 3.26 (d, *J* = 14.4 Hz, 1H), 3.16 (d, *J* = 14.8 Hz, 1H), 2.83 (s, 3H), 1.80-1.69 (m, 3H), 1.64-1.57 (m, 2H), 1.33 (s, 3H), 1.26-1.20 (m, 1H), 1.18-1.11 (m, 1H), 0.94 (s, 3H); <sup>13</sup>C NMR (100 MHz, CDCl<sub>3</sub>) δ 62.6, 51.6, 50.2, 46.9, 45.5, 37.4, 34.6, 34.4, 26.1, 21.4, 20.8; HRMS (ESI)



$C_{11}H_{21}N_2O_2S$  (M+H)<sup>+</sup> calcd. 245.1323, found 245.1320.

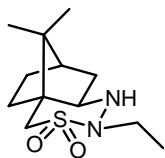

**5c**

**(S)-(-)-N<sup>a</sup>-ethyl cyclic camphor sulfonyl hydrazine (5c)** Prepared

according to the general procedure with **3c** to provide the title compound as a white solid in 81% yield; Mp 105 °C;  $[\alpha]_D^{20} = -111.3$

(c = 1.05, CHCl<sub>3</sub>); IR (neat) 3359, 2956, 2878, 1333, 1176, 1143 cm<sup>-1</sup>;

<sup>1</sup>H NMR (400 MHz, CDCl<sub>3</sub>) δ 4.00 (br, 1H), 3.42-3.34 (m, 1H), 3.23 (d, *J* = 14.4 Hz, 1H), 3.23-3.19 (m, 1H), 3.13 (d, *J* = 14.4 Hz, 1H), 3.05-2.96 (m, 1H), 1.78-1.68 (m, 3H), 1.65-1.56 (m, 2H), 1.33 (s, 3H), 1.24-1.10 (m, 2H), 1.19 (t, *J* = 7.0 Hz, 3H), 0.93 (s, 3H); <sup>13</sup>C NMR (100 MHz, CDCl<sub>3</sub>) δ 62.9, 51.3, 50.6, 46.5, 45.1, 41.4, 37.0, 34.1, 25.9, 21.1, 20.5, 12.3; HRMS (ESI) C<sub>12</sub>H<sub>23</sub>N<sub>2</sub>O<sub>2</sub>S (M+H)<sup>+</sup> calcd. 259.1480, found 259.1477; Anal. C<sub>12</sub>H<sub>22</sub>N<sub>2</sub>O<sub>2</sub>S calcd. C 55.78, H 8.58, N 10.84, S 12.41; found C 55.61, H 8.76, N 10.86, S 12.42.

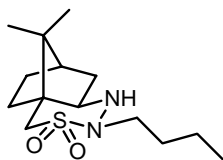

**5d**

**(S)-(-)-N<sup>a</sup>-ethyl cyclic camphor sulfonyl hydrazine (5d)**

Prepared according to the general procedure with **3d** to provide the title compound as a colorless oil in 92% yield;  $[\alpha]_D^{20} = -88.4$

(c = 1.2, CHCl<sub>3</sub>); IR (neat) 2958, 2877, 1328, 1161, 1136 cm<sup>-1</sup>;

<sup>1</sup>H NMR (400 MHz, CDCl<sub>3</sub>) δ 3.37-3.30 (m, 1H), 3.23 (d, *J* = 14.4 Hz, 1H), 3.21-3.18 (m, 1H), 3.12 (d, *J* = 14.0 Hz, 1H), 2.90-2.83 (m, 1H), 1.77-1.68 (m, 3H), 1.63-1.56 (m, 4H), 1.36-1.29 (m, 2H), 1.32 (s, 3H), 1.24-1.10 (m, 2H), 0.93 (s, 3H), 0.91 (t, *J* = 7.0 Hz, 3H); <sup>13</sup>C NMR (100 MHz, CDCl<sub>3</sub>) δ 63.1, 51.5, 50.8, 46.9, 46.6, 45.5, 37.4, 34.5, 29.2, 26.2, 21.4, 20.8, 20.2, 14.0; HRMS (ESI) C<sub>14</sub>H<sub>27</sub>N<sub>2</sub>O<sub>2</sub>S (M+H)<sup>+</sup> calcd. 287.1793, found 287.1803.

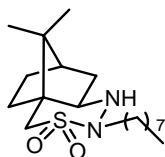

**5e**

**(S)-(-)-N<sup>a</sup>-ethyl cyclic camphor sulfonyl hydrazine (5e)** Prepared

according to the general procedure with **3e** to provide the title compound as a colorless oil in 96% yield;  $[\alpha]_D^{20} = -76.8$  (c = 1.1,

CHCl<sub>3</sub>); IR (neat) 2922, 1733, 1733, 1455, 1328, 1136 cm<sup>-1</sup>; <sup>1</sup>H NMR

(400 MHz, CDCl<sub>3</sub>) δ 3.33-3.28 (m, 1H), 3.23 (d, *J* = 14.4 Hz, 1H), 3.21-3.17 (m, 1H),

3.12 (d,  $J = 14.4$  Hz, 1H), 2.88-2.83 (m, 1H), 1.77-1.68 (m, 3H), 1.61-1.56 (m, 4H), 1.39 (s, 3H), 1.27-1.10 (m, 12H), 0.93 (s, 3H), 0.87 (t,  $J = 12$  Hz, 3H);  $^{13}\text{C}$  NMR (100 MHz,  $\text{CDCl}_3$ )  $\delta$  63.1, 51.5, 50.8, 46.9, 45.5, 37.4, 34.5, 32.0, 29.4, 27.1, 27.0, 26.2, 22.9, 21.4, 20.8, 14.3; HRMS (ESI)  $\text{C}_{18}\text{H}_{35}\text{N}_2\text{O}_2\text{S}$  ( $\text{M}+\text{H}$ ) $^+$  calcd. 343.2419, found 343.2425.

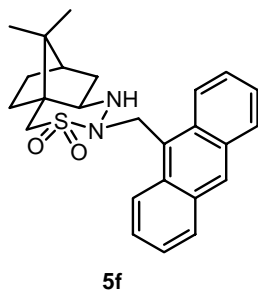

**(S)-(+)- $N^{\alpha}$ -9-methyl anthryl cyclic camphor sulfonyl hydrazine (5f)**

Prepared according to the general procedure with **3f** to provide the title compound as a yellow solid in 25% yield; Mp 151-153 °C;  $[\alpha]_{\text{D}}^{20} = +24.0$  ( $c = 0.9$ ,  $\text{CHCl}_3$ ); IR (neat) 2956, 1322, 1140  $\text{cm}^{-1}$ ;  $^1\text{H}$  NMR (400 MHz,  $\text{CDCl}_3$ )  $\delta$  8.48 (d,  $J = 9.6$  Hz, 3H), 8.01 (d,  $J = 8.8$  Hz, 2H),

7.57-7.46 (m, 4H), 5.58 (d,  $J = 14.0$  Hz, 1H), 4.96 (d,  $J = 14.0$  Hz, 1H), 4.15 (br, 1H), 3.36 (d,  $J = 14.4$  Hz, 1H), 3.27 (d,  $J = 14.4$  Hz, 1H), 2.74 (t,  $J = 7.4$  Hz, 1H), 1.64-1.47 (m, 3H), 1.36 (s, 3H), 1.33 (m, 2H), 1.02-0.93 (m, 2H), 0.93 (s, 3H);  $^{13}\text{C}$  NMR (100 MHz,  $\text{CDCl}_3$ )  $\delta$  131.5, 131.3, 128.9, 128.3, 126.5, 126.0, 124.8, 124.7, 63.1, 51.3, 51.0, 46.6, 45.1, 41.8, 36.9, 34.1, 25.8, 21.1, 20.6; HRMS (MALDI-TOF)  $\text{C}_{25}\text{H}_{28}\text{N}_2\text{NaO}_2\text{S}$  ( $\text{M}+\text{Na}$ ) $^+$  calcd. 443.17637, found 443.1764.

**General procedure for Diels-Alder reaction** Catalyst **5c** (0.2 mmol, trichloroacetic acid (0.1 mmol) and  $\alpha,\beta$ -unsaturated aldehyde (1 mmol) was suspended in 1 ml brine. After stirring at room temperature for 5 minutes, the reaction was cooled down to 0 °C and a freshly distilled cyclopentadiene (6 mmol) was added. The reaction was kept at 0 °C until consumption of the starting material (tracked by TLC). 20 ml ethyl acetate and 5 ml water were added to the mixture. The separated organic layer was dried with anhydrous  $\text{Na}_2\text{SO}_4$ , followed by further purification via column chromatography to give a mixture of Diels-Alder adduct.

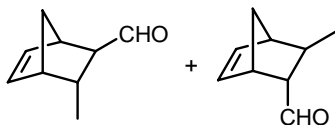

**(1*R*,2*S*,3*R*,4*S*)-3-Methylbicyclo[2,2,1]hept-5-ene-2-carboxaldehyde** and **(1*S*,2*S*,3*R*,4*R*)-3-Methylbicyclo[2,2,1]hept-5-ene-2-carboxaldehyde** (Table 4, entry 1) Prepared according to the general procedure with *trans*-crotonaldehyde to provide the title compound as a colorless oil in 92% yield; 1:1.5 *exo:endo*, 83% *endo ee*. The *endo* enantiomeric excess was obtained by acetalization with (+)-(*R,R*)-hydrobenzoin and <sup>1</sup>H NMR analysis:<sup>1</sup> (400 MHz, C<sub>6</sub>D<sub>6</sub>) *endo* isomers δ 5.07 (d, *J* = 8.4 Hz, CHO<sub>2</sub>, major isomer), δ 5.02 (d, *J* = 8.0 Hz, CHO<sub>2</sub>, minor isomer); IR (neat) 3445, 2959, 1699, 1455 cm<sup>-1</sup>; <sup>1</sup>H NMR, <sup>13</sup>C NMR data are in agreement with the published data.<sup>2,3</sup>

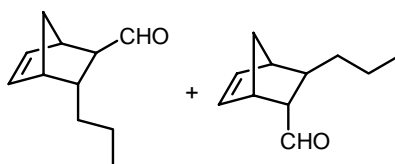

**(1*R*,2*S*,3*R*,4*S*)-3-Propylbicyclo[2,2,1]hept-5-ene-2-carboxaldehyde** and **(1*S*,2*S*,3*R*,4*R*)-3-Propylbicyclo[2,2,1]hept-5-ene-2-carboxaldehyde** (Table 4, entry 2) Prepared according to the general procedure with *trans*-2-hexenal to provide the title compound as a colorless oil in 71% yield; 1:1.3 *exo:endo*, 68% *exo ee*, 83% *endo ee*. The enantiomeric excess was determined by reduction of the formyl group (2.0 eq NaBH<sub>4</sub>, Et<sub>2</sub>O/MeOH=2/1 (v/v, 0.2 M)) followed by conversion of the resulting alcohol to the benzoyl ester (3.0 eq Et<sub>3</sub>N, 0.1 eq DMAP and 1.1 eq BzCl, CH<sub>2</sub>Cl<sub>2</sub> (0.2 M)) and HPLC analysis. Enantiomers were separated by HPLC using a Daicel Chiralcel OD-H column guarded with Chiralcel OD Guard column (*n*-Hexane / *i*-PrOH = 99.5 / 0.5; flow rate = 0.5 ml/min; *endo* isomers: T<sub>R1</sub> = 24.7 min (minor), T<sub>R2</sub> = 26.1 min (major); *exo* isomers: T<sub>R1</sub> = 28.6 min (minor), T<sub>R2</sub> = 30.2 min (major)); The same *endo* enantiomeric excess was obtained by acetalization with (+)-(*R,R*)-hydrobenzoin and <sup>1</sup>H NMR analysis: (400 MHz, C<sub>6</sub>D<sub>6</sub>) *endo* isomers δ 5.09 (d, *J* = 8.4 Hz, CHO<sub>2</sub>, major isomer), δ 5.03 (d, *J* = 8.0 Hz, CHO<sub>2</sub>, minor isomer); IR

(neat) 2960, 1704, 1466  $\text{cm}^{-1}$ ;  $^1\text{H}$  NMR,  $^{13}\text{C}$  NMR data are in agreement with the published data.<sup>2,3</sup>

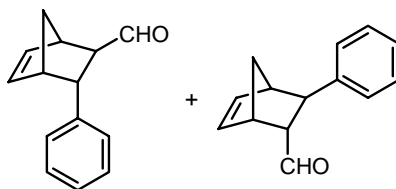

**(1R,2R,3R,4S)-3-Phenylbicyclo[2,2,1]hept-5-ene-2-carboxaldehyde** and **(1S,2R,3R,4R)-3-Phenylbicyclo[2,2,1]hept-5-ene-2-carboxaldehyde** (Table 4, entry 3)

Prepared according to the general procedure with *trans*-cinnamaldehyde to provide the title compound as a colorless oil in 92% yield; 1:1.1 *exo:endo*, 78% *exo ee*, 93% *endo ee*. The enantiomeric excess was determined by reduction of the formyl group followed by conversion of the resulting alcohol to the benzoyl ester and HPLC analysis. Enantiomers were separated by HPLC using a Daicel Chiralpak AD-H column guarded with Chiracel OD Guard column (*n*-Hexane / *i*-PrOH = 99 / 1; flow rate = 0.75 ml/min; *endo* isomers:  $T_{R1}$  = 13.8 min (minor),  $T_{R2}$  = 20.0 min (major); *exo* isomers:  $T_{R1}$  = 15.0 min (minor),  $T_{R2}$  = 23.0 min (major)); The same *endo* enantiomeric excess was obtained by acetalization with (+)-(*R,R*)-hydrobenzoin and  $^1\text{H}$  NMR analysis: (400 MHz,  $\text{C}_6\text{D}_6$ ) *endo* isomers  $\delta$  5.22 (d,  $J$  = 8.0 Hz,  $\text{CHO}_2$ , major isomer),  $\delta$  5.18 (d,  $J$  = 8.4 Hz,  $\text{CHO}_2$ , minor isomer); IR (neat) 3061, 2972, 1716, 1601, 1496  $\text{cm}^{-1}$ ; ***exo* isomer**  $^1\text{H}$  NMR (400 MHz,  $\text{CDCl}_3$ )  $\delta$  9.93 (d,  $J$  = 2.0 Hz, 1H), 7.34-7.15 (m, 5H), 6.35 (dd,  $J$  = 5.6, 3.2 Hz, 1H), 6.08 (dd,  $J$  = 5.6, 3.2 Hz, 1H), 3.74-3.72 (m, 1H), 3.24-3.22 (m, 2H), 2.62-2.59 (m, 1H), 1.65-1.61 (m, 1H), 1.58-1.55 (m, 1H);  $^{13}\text{C}$  NMR (100 MHz,  $\text{CDCl}_3$ )  $\delta$  202.7, 142.5, 136.5, 136.2, 128.1, 127.8, 126.1, 59.4, 48.4, 47.5, 45.42, 45.35; ***endo* isomer**  $^1\text{H}$  NMR (400 MHz,  $\text{CDCl}_3$ )  $\delta$  9.61 (d,  $J$  = 2.0 Hz, 1H), 7.34-7.15 (m, 5H), 6.43 (dd,  $J$  = 5.6, 3.2 Hz, 1H), 6.18 (dd,  $J$  = 5.6, 2.8 Hz, 1H), 3.34 (s, 1H), 3.14-3.09 (m, 2H), 3.00-2.98 (m, 1H), 1.83-1.81 (m, 1H), 1.64-1.61 (m, 1H);  $^{13}\text{C}$  NMR (100 MHz,  $\text{CDCl}_3$ )  $\delta$  203.5, 143.5, 139.2, 133.7, 128.5, 127.3, 126.3, 60.8, 48.3, 47.1, 45.6, 45.1.

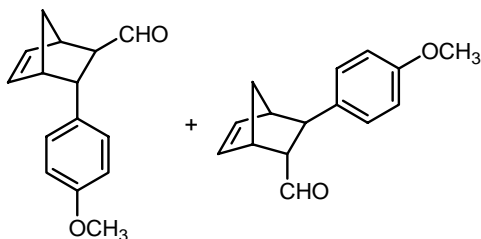

**(1*R*,2*R*,3*R*,4*S*)-3-(4-Methoxyphenylbicyclo[2,2,1]hept-5-ene-2-carboxaldehyde**  
**and**

**(1*S*,2*R*,3*R*,4*R*)-3-(4-Methoxyphenylbicyclo[2,2,1]hept-5-ene-2-carboxaldehyde**

**(Table 4, entry 4)** Prepared according to the general procedure with *trans*-cinnamaldehyde to provide the title compound as a colorless oil in 82% yield; 1:0.94 *exo:endo*, 81% *exo ee*, 91% *endo ee*. The enantiomeric excess was determined by reduction of the formyl group followed by conversion of the resulting alcohol to the benzoyl ester and HPLC analysis. Enantiomers were separated by HPLC using a Daicel Chiralpak AD-H column guarded with Chiracel OD Guard column (*n*-Hexane / *i*-PrOH = 98 / 2; flow rate = 0.75 ml/min; *endo* isomers: T<sub>R1</sub> = 16.5 min (minor), T<sub>R2</sub> = 27.5 min (major); *exo* isomers: T<sub>R1</sub> = 19.5 min (minor), T<sub>R2</sub> = 24.9 min (major)); The same *endo* enantiomeric excess was obtained by acetalization with (+)-(*R,R*)-hydrobenzoin and <sup>1</sup>H NMR analysis: (400 MHz, C<sub>6</sub>D<sub>6</sub>) *endo* isomers δ 5.25 (d, *J* = 8.0 Hz, CHO<sub>2</sub>, major isomer), δ 5.20 (d, *J* = 8.4 Hz, CHO<sub>2</sub>, minor isomer); IR (neat) 2963, 1716, 1611, 1513, 1248, 1035 cm<sup>-1</sup>; Mixture of *exo* and *endo* isomers <sup>1</sup>H NMR (400 MHz, CDCl<sub>3</sub>) δ 9.91 (d, *J* = 2.0 Hz, 1H), 9.58 (d, *J* = 2.0 Hz, 1H), 7.20-7.17 (m, 2H), 7.08-7.06 (m, 2H), 6.87-6.84 (m, 2H), 6.81-6.78 (m, 2H), 6.41 (dd, *J* = 5.8, 3.4 Hz, 1H), 6.34 (dd, *J* = 5.6, 3.2 Hz, 1H), 6.16 (dd, *J* = 5.8, 2.6 Hz, 1H), 6.07 (dd, *J* = 5.4, 3.0 Hz, 1H), 3.79 (s, 3H), 3.77 (s, 3H), 3.66 (dd, *J* = 5.2, 3.6 Hz, 1H), 3.32 (s, 1H), 3.21 (d, *J* = 1.6 Hz, 1H), 3.17 (s, 1H), 3.07 (d, *J* = 1.2 Hz, 1H), 3.03 (d, *J* = 5.2 Hz, 1H), 2.95-2.92 (m, 1H), 2.55-2.53 (m, 1H), 1.79 (d, *J* = 8.8 Hz, 1H), 1.62-1.59 (m, 2H), 1.56-1.53 (m, 1H); <sup>13</sup>C NMR (100 MHz, CDCl<sub>3</sub>) δ 203.7, 202.9, 157.9, 157.8, 139.0, 136.3, 136.1, 135.4, 134.4, 133.5, 128.6, 128.1, 113.8, 113.3, 60.7, 59.4, 55.1, 55.0, 48.5, 48.4, 47.4, 46.9, 45.3, 44.91, 44.86, 44.5; HRMS (ESI) C<sub>15</sub>H<sub>17</sub>O<sub>2</sub> (M+H)<sup>+</sup> calcd. 229.1228, found 229.1222.

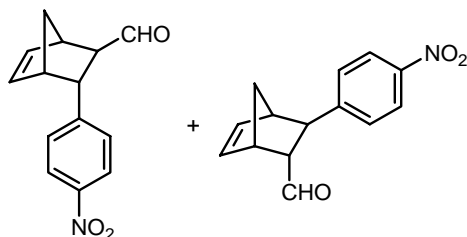

**(1*R*,2*R*,3*R*,4*S*)-3-(4-Nitrophenylbicyclo[2,2,1]hept-5-ene-2-carboxaldehyde and (1*S*,2*R*,3*R*,4*R*)-3-(4-Nitrophenylbicyclo[2,2,1]hept-5-ene-2-carboxaldehyde (Table 4, entry 5)** Prepared according to the general procedure with *trans*-cinnamaldehyde to provide the title compound as a colorless oil in 99% yield; 1:1.1 *exo:endo*, 81% *exo ee*, 91% *endo ee*. The enantiomeric excess was determined by reduction of the formyl group followed by conversion of the resulting alcohol to the benzoyl ester and HPLC analysis. Enantiomers were separated by HPLC using a Daicel Chiralpak AD-H column (*n*-Hexane / *i*-PrOH = 96 / 4; flow rate = 1 ml/min; *endo* isomers: T<sub>R1</sub> = 16.2 min (minor), T<sub>R2</sub> = 28.4 min (major); *exo* isomers: T<sub>R1</sub> = 15.0 min (minor), T<sub>R2</sub> = 19.5 min (major)); The same *endo* enantiomeric excess was obtained by acetalization with (+)-(*R,R*)-hydrobenzoin and <sup>1</sup>H NMR analysis: (400 MHz, C<sub>6</sub>D<sub>6</sub>) *endo* isomers δ 5.11 (d, *J* = 8.4 Hz, CHO<sub>2</sub>, major isomer), δ 5.04 (d, *J* = 8.0 Hz, CHO<sub>2</sub>, minor isomer); IR (neat) 3063, 2973, 1716, 1598, 1520, 1344, cm<sup>-1</sup>; <sup>1</sup>H NMR, <sup>13</sup>C NMR data are in agreement with the published data.<sup>1</sup>

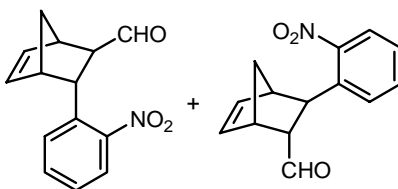

**(1*R*,2*R*,3*R*,4*S*)-3-(2-Nitrophenylbicyclo[2,2,1]hept-5-ene-2-carboxaldehyde and (1*S*,2*R*,3*R*,4*R*)-3-(2-Nitrophenylbicyclo[2,2,1]hept-5-ene-2-carboxaldehyde (Table 4, entry 6)** Prepared according to the general procedure with *trans*-crotonaldehyde to provide the title compound as a colorless oil in 94% yield; 1:2.5 *exo:endo*, 72% *exo ee*, 90% *endo ee*. The *endo* enantiomeric excess was obtained by acetalization with

(+)-(*R,R*)-hydrobenzoin and  $^1\text{H}$  NMR analysis:<sup>1</sup> (400 MHz,  $\text{C}_6\text{D}_6$ ) *exo* isomers  $\delta$  5.44 (d,  $J$  = 4.4 Hz,  $\text{CHO}_2$ , major isomer),  $\delta$  5.36 (d,  $J$  = 5.2 Hz,  $\text{CHO}_2$ , minor isomer) *endo* isomers  $\delta$  5.06 (d,  $J$  = 7.6 Hz,  $\text{CHO}_2$ , major isomer),  $\delta$  4.97 (d,  $J$  = 7.6 Hz,  $\text{CHO}_2$ , minor isomer); IR (neat) 3065, 2978, 1714, 1519, 1354  $\text{cm}^{-1}$ ;  $^1\text{H}$  NMR,  $^{13}\text{C}$  NMR data are in agreement with the published data.<sup>1</sup>

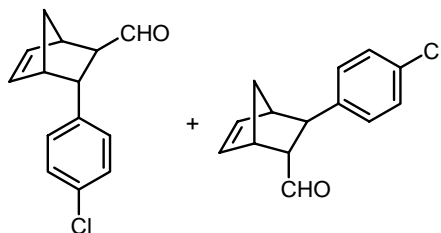

**(1*R*,2*R*,3*R*,4*S*)-3-(4-Chlorophenylbicyclo[2,2,1]hept-5-ene-2-carboxaldehyde and (1*S*,2*R*,3*R*,4*R*)-3-(4-Chlorophenylbicyclo[2,2,1]hept-5-ene-2-carboxaldehyde**

**(Table 4, entry 7)** Prepared according to the general procedure with *trans*-cinnamaldehyde to provide the title compound as a colorless oil in 81% yield; 1:1.1 *exo:endo*, 84% *exo ee*, 96% *endo ee*. The enantiomeric excess was determined by reduction of the formyl group followed by conversion of the resulting alcohol to the benzoyl ester and HPLC analysis. Enantiomers were separated by HPLC using a Daicel Chiralcel OD-H column (*n*-Hexane / *i*-PrOH = 98 / 2; flow rate = 0.5 ml/min; *endo* isomers:  $T_{\text{R}1}$  = 7.5 min (minor),  $T_{\text{R}2}$  = 14.0 min (major); *exo* isomers:  $T_{\text{R}1}$  = 8.3 min (minor),  $T_{\text{R}2}$  = 21.9 min (major)); The same *endo* enantiomeric excess was obtained by acetalization with (+)-(*R,R*)-hydrobenzoin and  $^1\text{H}$  NMR analysis: (400 MHz,  $\text{C}_6\text{D}_6$ ) *endo* isomers  $\delta$  5.25 (d,  $J$  = 8.0 Hz,  $\text{CHO}_2$ , major isomer),  $\delta$  5.20 (d,  $J$  = 8.4 Hz,  $\text{CHO}_2$ , minor isomer); IR (neat) 3064, 2973, 1716, 1493, 727  $\text{cm}^{-1}$ ;  $^1\text{H}$  NMR,  $^{13}\text{C}$  NMR data are in agreement with the published data.<sup>1</sup>

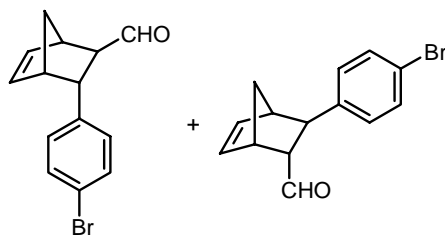

**(1R,2R,3R,4S)-3-(4-Bromophenylbicyclo[2,2,1]hept-5-ene-2-carboxaldehyde and (1S,2R,3R,4R)-3-(4-Bromophenylbicyclo[2,2,1]hept-5-ene-2-carboxaldehyde**

**(Table 4, entry 7)** Prepared according to the general procedure with *trans*-cinnamaldehyde to provide the title compound as a colorless oil in 81% yield; 1:1.1 *exo:endo*, 86% *exo ee*, 96% *endo ee*. The enantiomeric excess was determined by reduction of the formyl group followed by conversion of the resulting alcohol to the benzoyl ester and HPLC analysis. Enantiomers were separated by HPLC using a Daicel Chiralcel OD column (gradient, 0-10min, *n*-Hexane / *i*-PrOH = 98 / 2, 15min, *n*-Hexane / *i*-PrOH = 85 / 15; flow rate = 0.8 ml/min; *endo* isomers: T<sub>R</sub>1 = 8.6 min (minor), T<sub>R</sub>2 = 19.5 min (major); *exo* isomers: T<sub>R</sub>1 = 9.9 min (minor), T<sub>R</sub>2 = 24.0 min (major)); The same *endo* enantiomeric excess was obtained by acetalization with (+)-(*R,R*)-hydrobenzoin and <sup>1</sup>H NMR analysis: (400 MHz, C<sub>6</sub>D<sub>6</sub>) *endo* isomers δ 5.25 (d, *J* = 8.0 Hz, CHO<sub>2</sub>, major isomer), δ 5.20 (d, *J* = 8.4 Hz, CHO<sub>2</sub>, minor isomer); IR (neat) 3063, 2971, 1714, 1489, 517 cm<sup>-1</sup>; <sup>1</sup>H NMR, <sup>13</sup>C NMR data are in agreement with the published data.<sup>4</sup>



## Reference

- (1) Lemay, M.; Ogilvie, W. W. *Org. Lett.* **2005**, 7, 4141.
- (2) Ishihara, K.; Kurihara, H.; Matsumoto, M.; Yamamoto, H. *J. Am. Chem. Soc.* **1998**, 120, 6920.
- (3) Ahrendt, K. A.; Borths, C. J.; MacMillan, D. W. C. *J. Am. Chem. Soc.* **2000**, 122, 4243.
- (4) Gotoh, H.; Hayashi, Y. *Org. Lett.* **2007**, 9, 2859.

Table 4, entry 3

Racemic, *exo* : *endo* = 1:3.9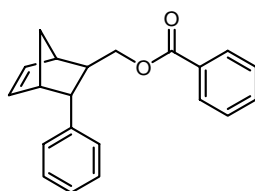*exo*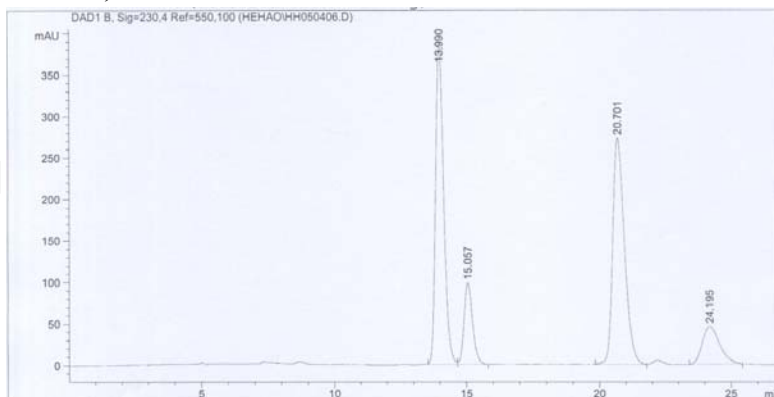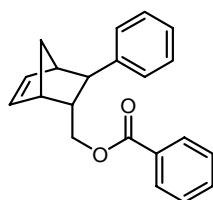*endo*

=====  
Area Percent Report  
=====

Sorted By : Signal  
Multiplier : 1.0000  
Dilution : 1.0000

Signal 1: DAD1 B, Sig=230,4 Ref=550,100

| Peak # | RetTime [min] | Type | Width [min] | Area [mAU*s] | Height [mAU] | Area %  |
|--------|---------------|------|-------------|--------------|--------------|---------|
| 1      | 13.990        | BV   | 0.3305      | 8272.56641   | 385.24973    | 39.3796 |
| 2      | 15.057        | VB   | 0.3390      | 2178.56616   | 98.11816     | 10.3705 |
| 3      | 20.701        | BB   | 0.4778      | 8455.21777   | 272.64249    | 40.2490 |
| 4      | 24.195        | BB   | 0.6930      | 2100.90601   | 45.64052     | 10.0009 |

Totals : 2.10073e4 801.65089

Optically active, *exo* : *endo* = 1:1.1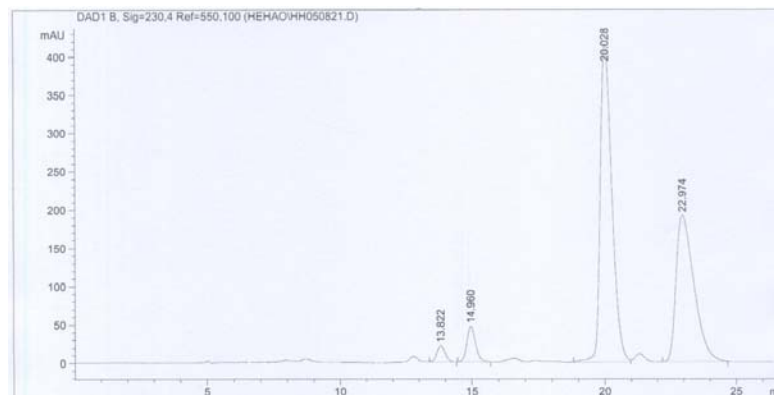

=====  
Area Percent Report  
=====

Sorted By : Signal  
Multiplier : 1.0000  
Dilution : 1.0000

Signal 1: DAD1 B, Sig=230,4 Ref=550,100

| Peak # | RetTime [min] | Type | Width [min] | Area [mAU*s] | Height [mAU] | Area %  |
|--------|---------------|------|-------------|--------------|--------------|---------|
| 1      | 13.822        | BB   | 0.3471      | 478.00043    | 21.52368     | 2.0409  |
| 2      | 14.960        | BB   | 0.3471      | 1076.58740   | 47.03271     | 4.5967  |
| 3      | 20.028        | BV   | 0.4785      | 1.27720e4    | 415.69586    | 54.5321 |
| 4      | 22.974        | BB   | 0.7184      | 9094.49902   | 191.39322    | 38.8304 |

Totals : 2.34211e4 675.64547

Table 4, entry 5

Racemic, *exo* : *endo* = 1:1.2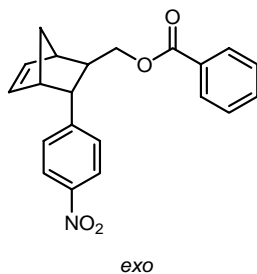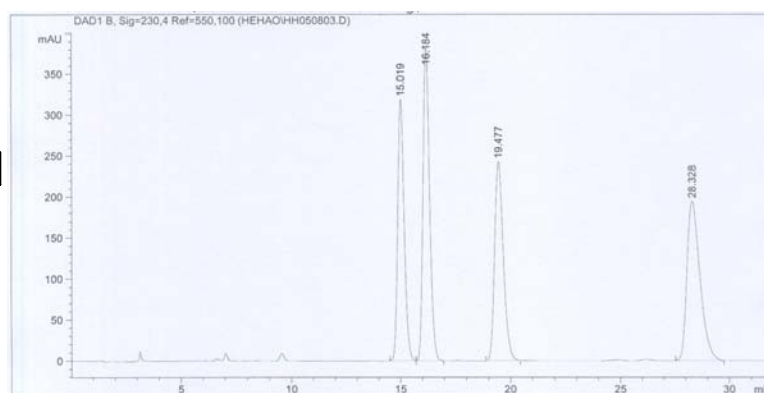

=====  
Area Percent Report  
=====

Sorted By : Signal  
Multiplier : 1.0000  
Dilution : 1.0000

Signal 1: DAD1 B, Sig=230,4 Ref=550,100

| Peak # | RetTime [min] | Type | Width [min] | Area [mAU*s] | Height [mAU] | Area %  |
|--------|---------------|------|-------------|--------------|--------------|---------|
| 1      | 15.019        | BV   | 0.3170      | 6595.68457   | 319.23715    | 22.4687 |
| 2      | 16.184        | VB   | 0.3254      | 8035.39160   | 381.98285    | 27.3732 |
| 3      | 19.477        | BB   | 0.4195      | 6646.67480   | 242.74088    | 22.6424 |
| 4      | 28.328        | BB   | 0.6446      | 8077.20557   | 194.43956    | 27.5156 |

Totals : 2.93550e4 1138.40044

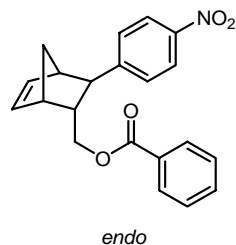Optically active, *exo* : *endo* = 1:1.1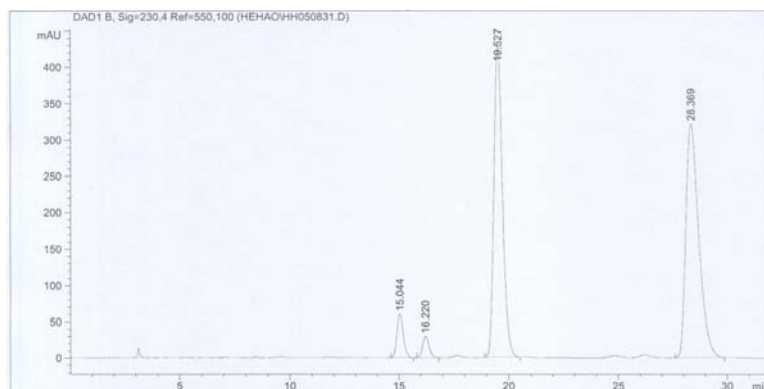

=====  
Area Percent Report  
=====

Sorted By : Signal  
Multiplier : 1.0000  
Dilution : 1.0000

Signal 1: DAD1 B, Sig=230,4 Ref=550,100

| Peak # | RetTime [min] | Type | Width [min] | Area [mAU*s] | Height [mAU] | Area %  |
|--------|---------------|------|-------------|--------------|--------------|---------|
| 1      | 15.044        | BB   | 0.3139      | 1231.32849   | 60.39216     | 4.5973  |
| 2      | 16.220        | BB   | 0.3147      | 618.47601    | 29.73297     | 2.3092  |
| 3      | 19.527        | BB   | 0.4165      | 1.16829e4    | 430.66559    | 43.6197 |
| 4      | 28.369        | BB   | 0.6371      | 1.32508e4    | 321.30524    | 49.4738 |

Totals : 2.67835e4 842.09595

Table 4, entry 3

Racemic, *exo* : *endo* = 1:2.9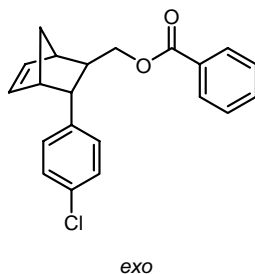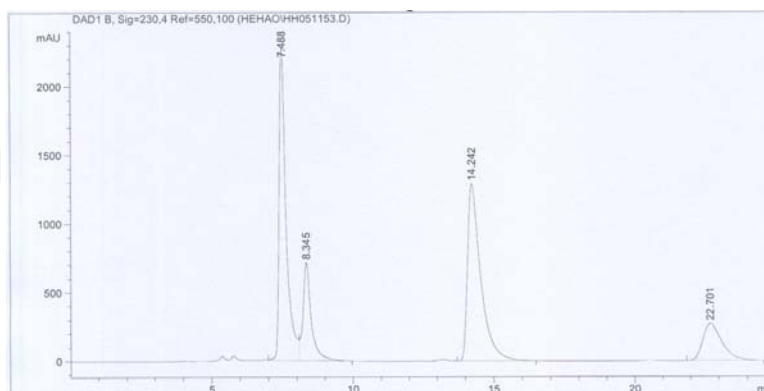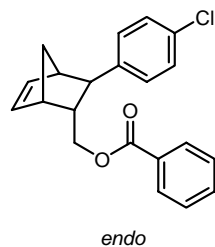

=====  
Area Percent Report  
=====

Sorted By : Signal  
Multiplier : 1.0000  
Dilution : 1.0000

Signal 1: DAD1 B, Sig=230,4 Ref=550,100

| Peak # | RetTime [min] | Type | Width [min] | Area [mAU*s] | Height [mAU] | Area %  |
|--------|---------------|------|-------------|--------------|--------------|---------|
| 1      | 7.488         | VV   | 0.2524      | 3.92763e4    | 2286.62500   | 36.1648 |
| 2      | 8.345         | VP   | 0.2948      | 1.46192e4    | 714.23737    | 13.4610 |
| 3      | 14.242        | VB   | 0.4700      | 4.18248e4    | 1290.85156   | 38.5114 |
| 4      | 22.701        | BB   | 0.7154      | 1.28833e4    | 270.62262    | 11.8627 |

Totals : 1.08603e5 4562.33655

Optically active, *exo* : *endo* = 1:1.1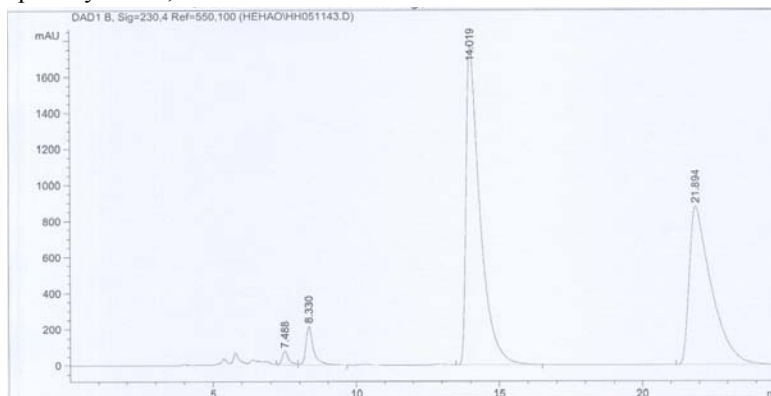

=====  
Area Percent Report  
=====

Sorted By : Signal  
Multiplier : 1.0000  
Dilution : 1.0000

Signal 1: DAD1 B, Sig=230,4 Ref=550,100

| Peak # | RetTime [min] | Type | Width [min] | Area [mAU*s] | Height [mAU] | Area %  |
|--------|---------------|------|-------------|--------------|--------------|---------|
| 1      | 7.488         | VV   | 0.2439      | 1244.74561   | 75.66874     | 1.1089  |
| 2      | 8.330         | VB   | 0.2711      | 4040.59668   | 215.14749    | 3.5995  |
| 3      | 14.019        | VB   | 0.4709      | 5.96157e4    | 1779.36743   | 53.1073 |
| 4      | 21.894        | BB   | 0.7537      | 4.73541e4    | 877.35309    | 42.1843 |

Totals : 1.12255e5 2947.53675

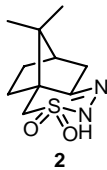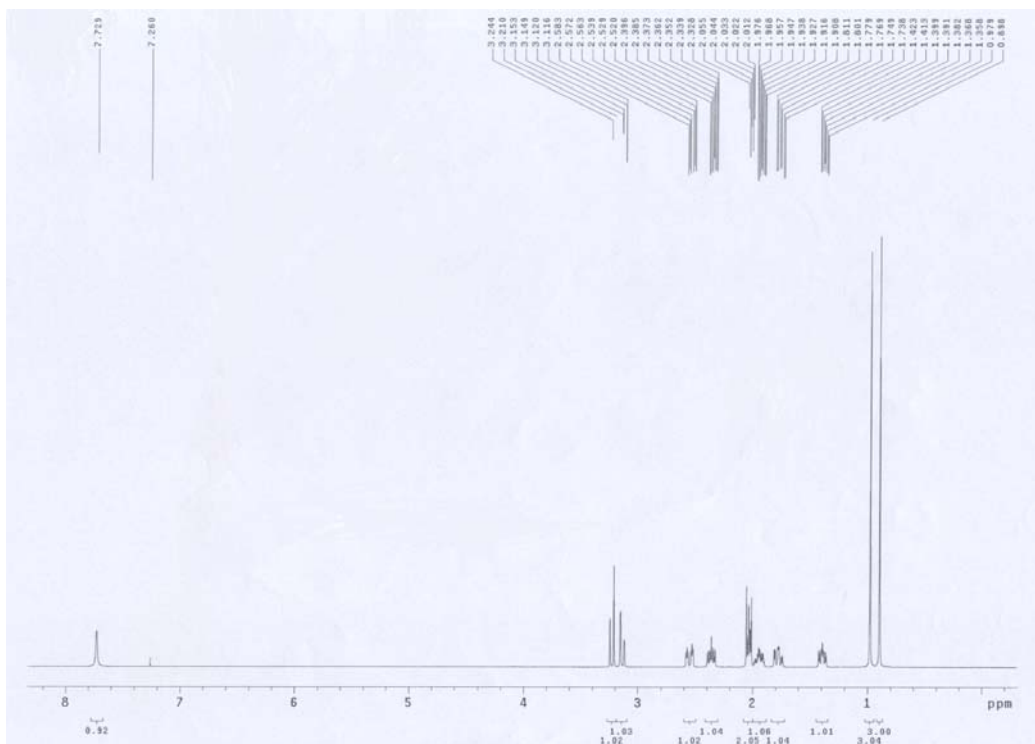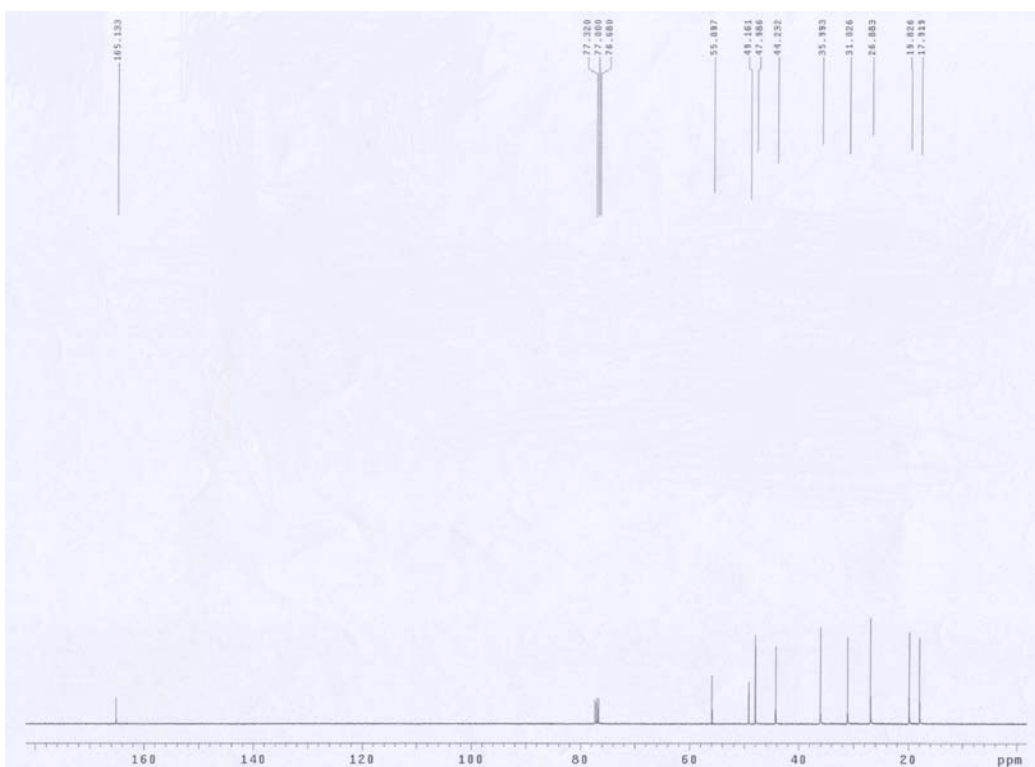

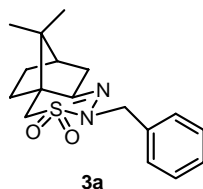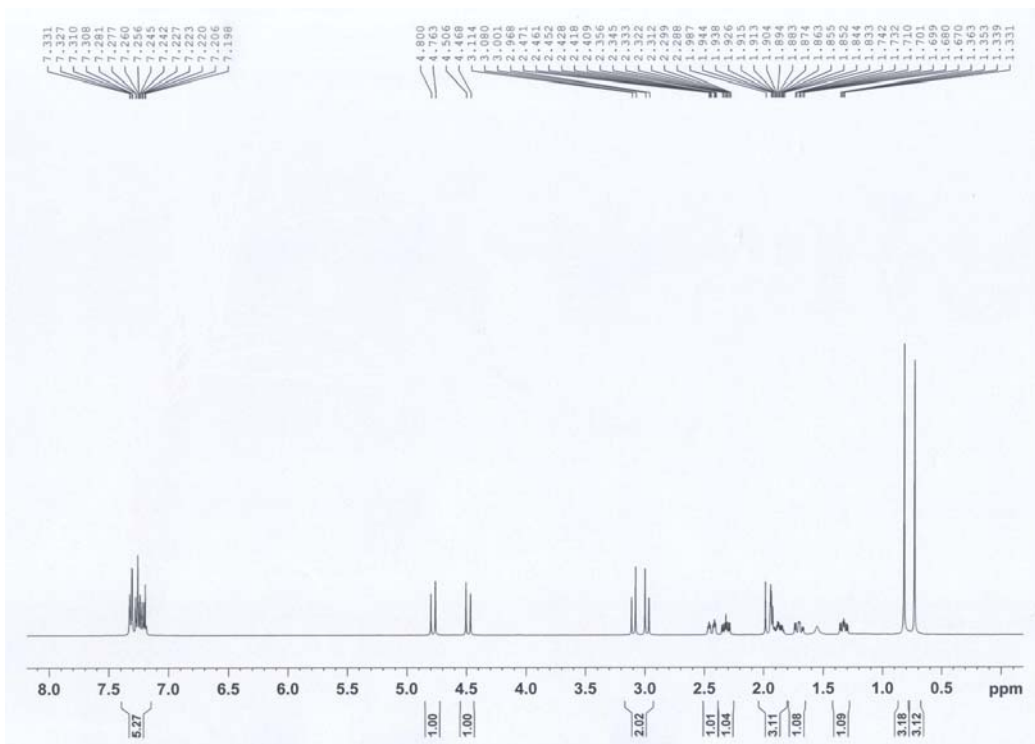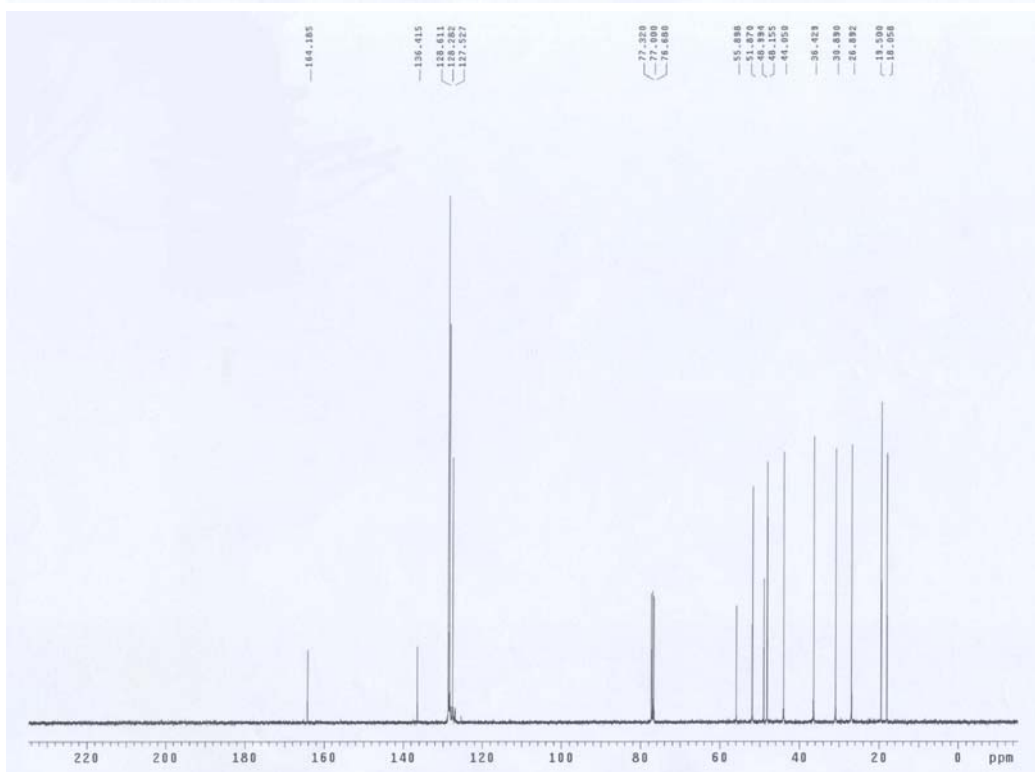

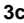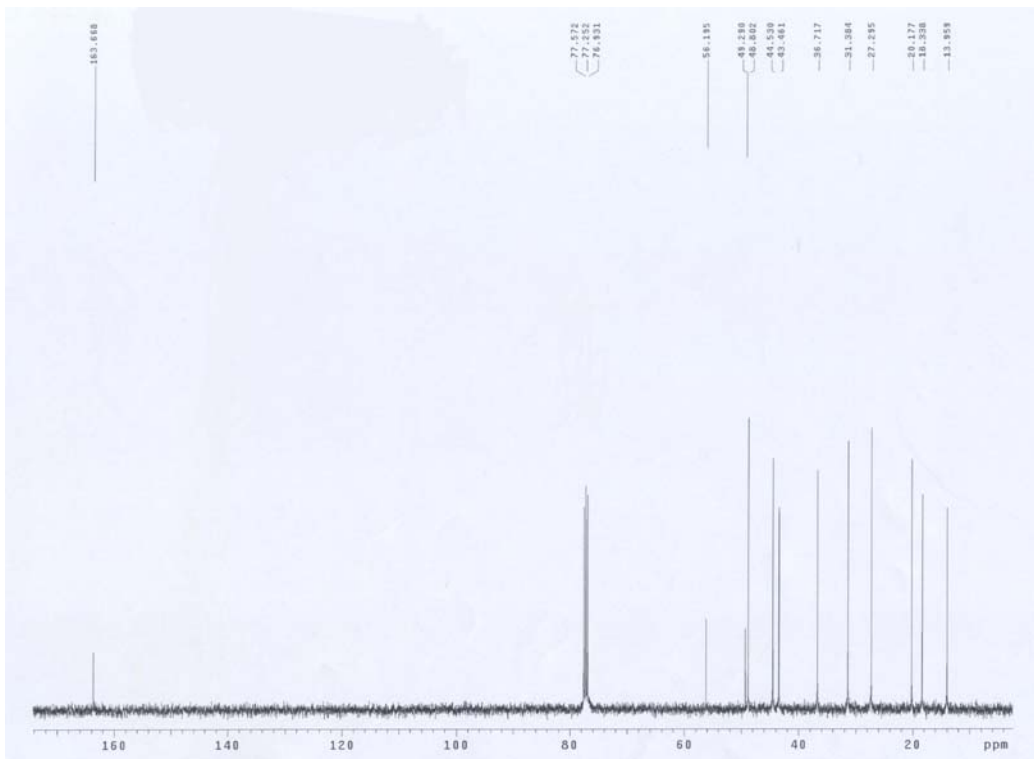

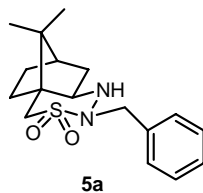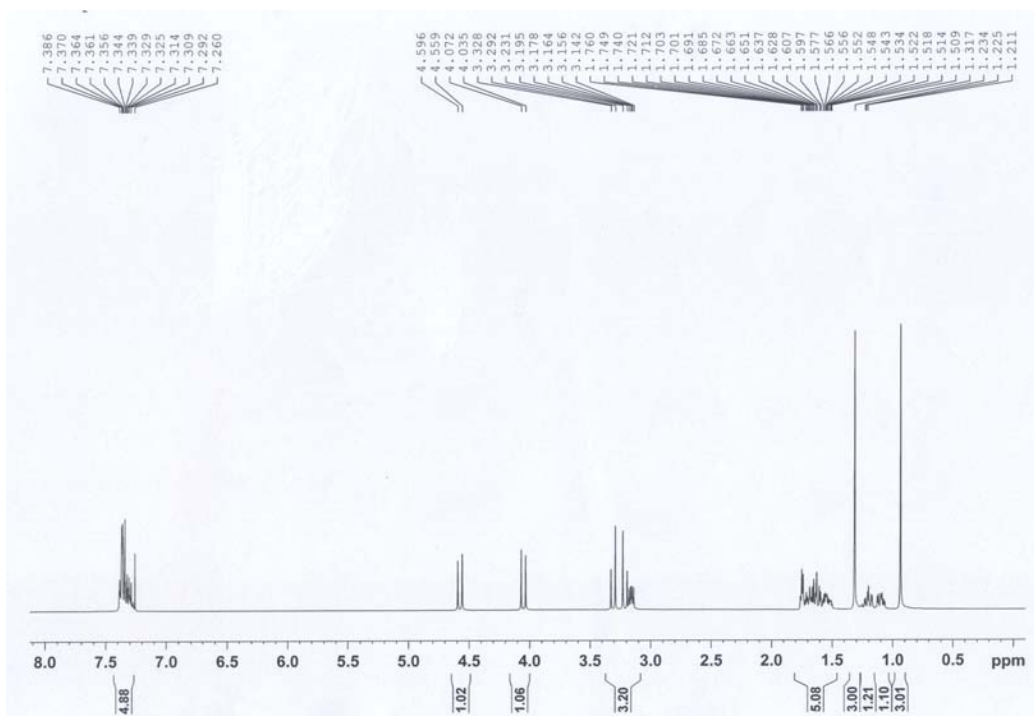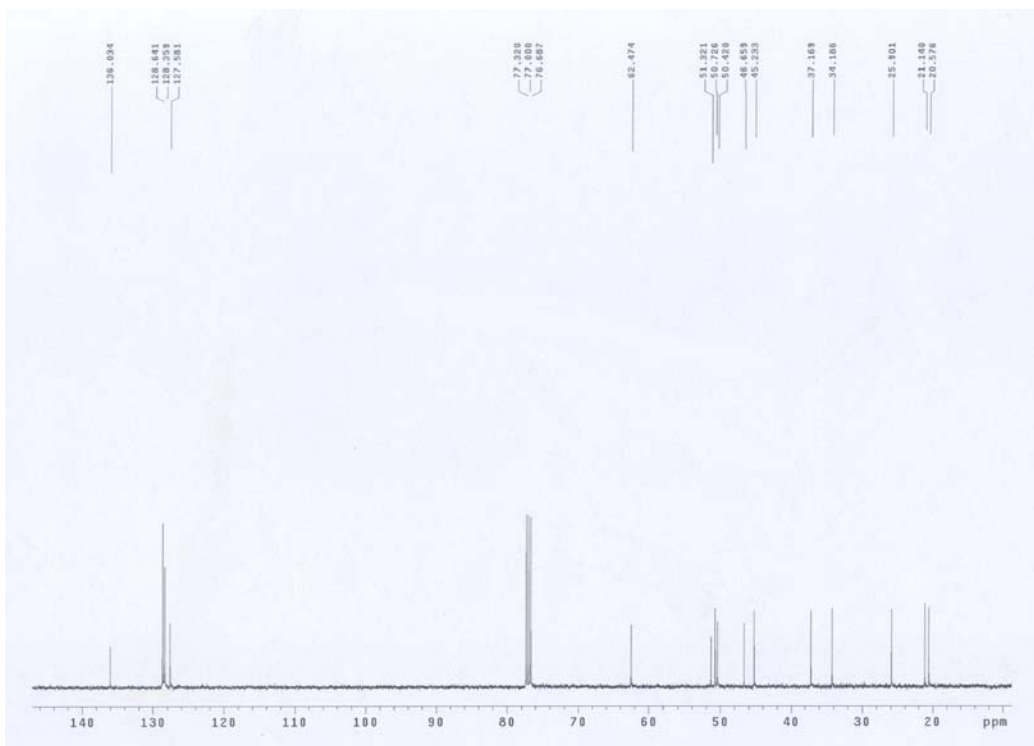



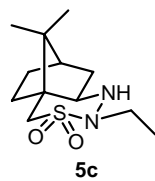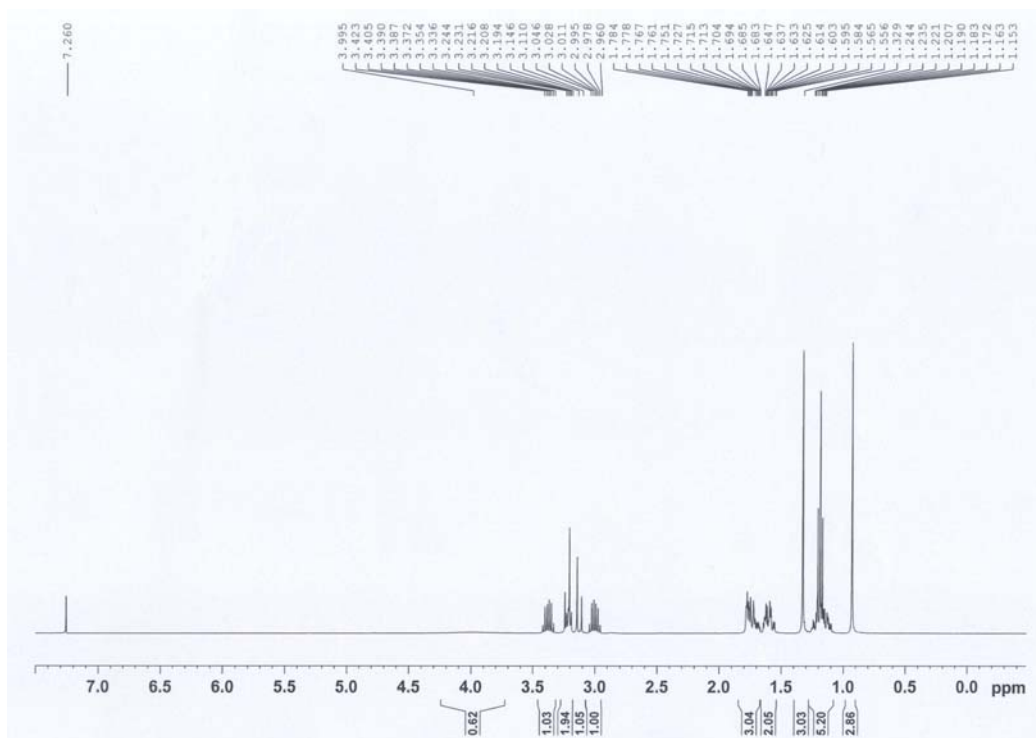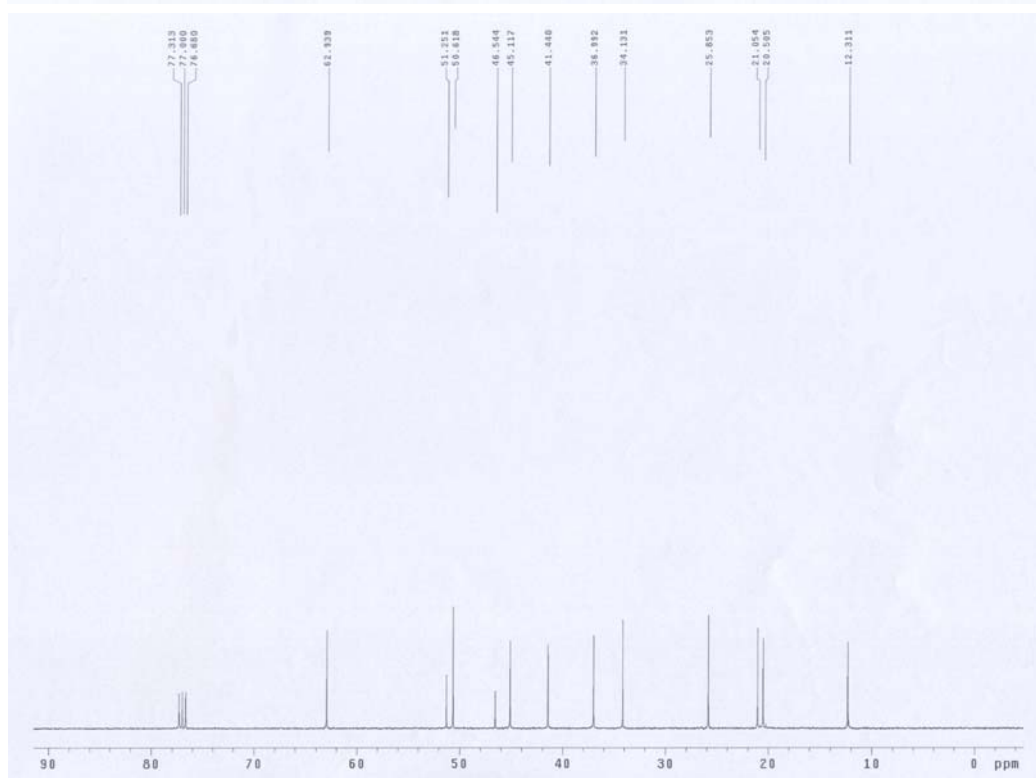

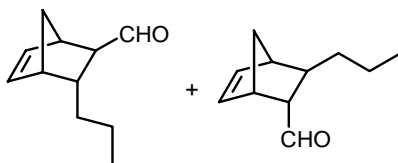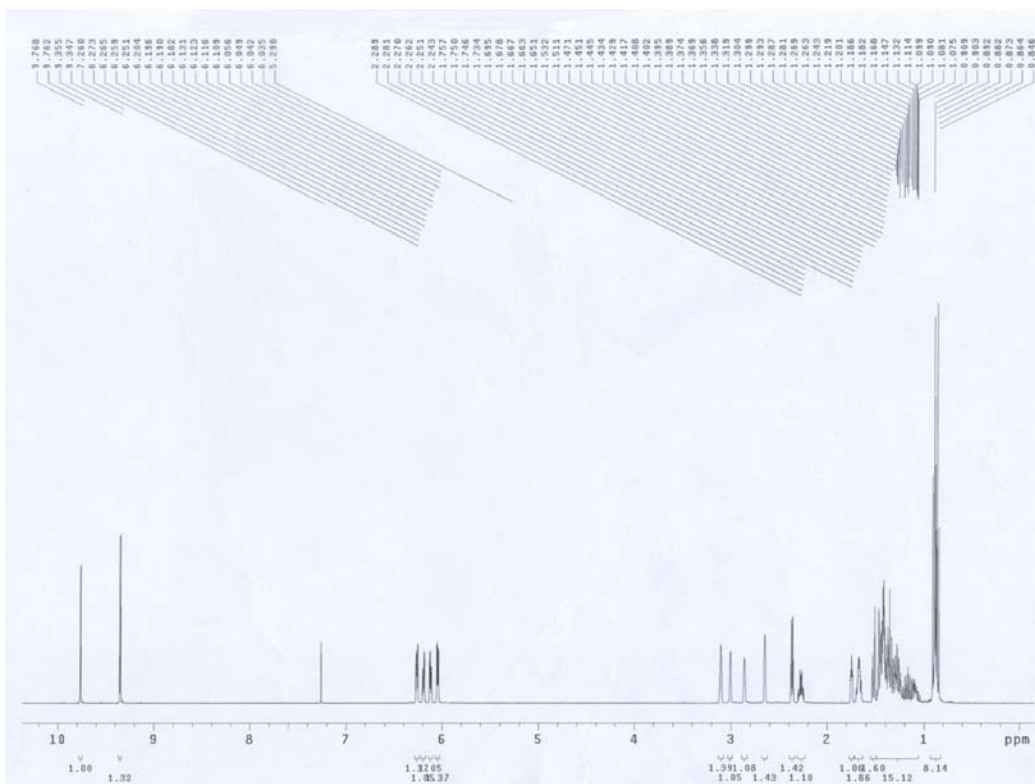

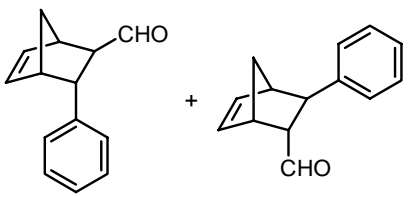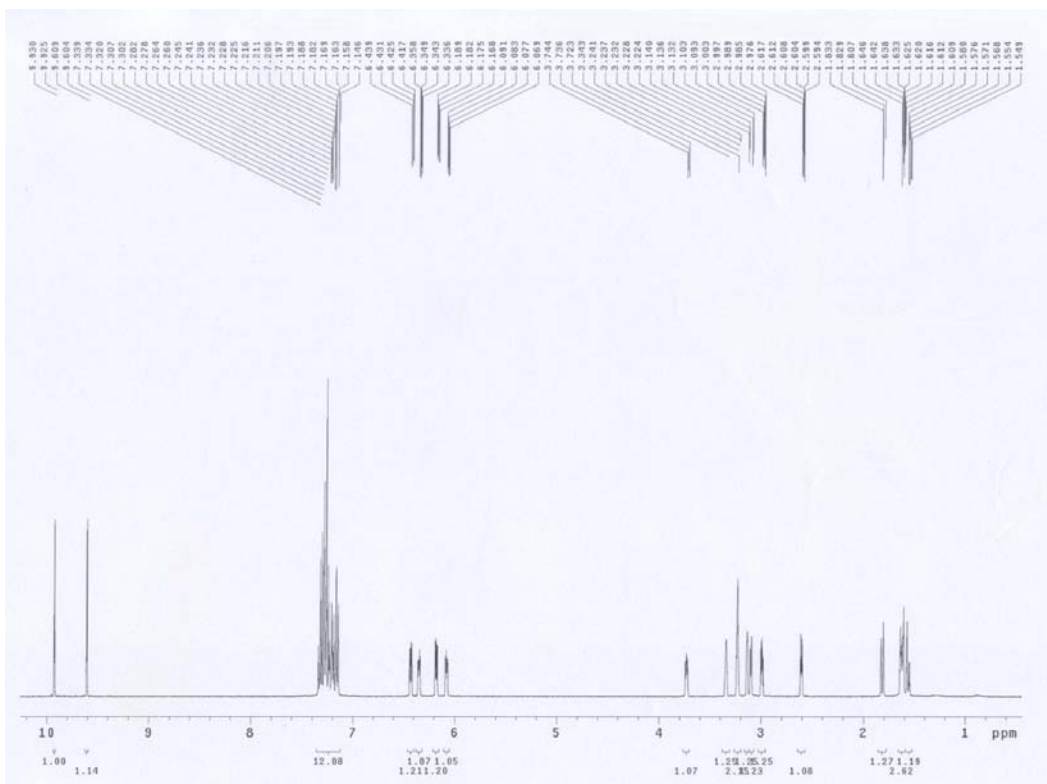

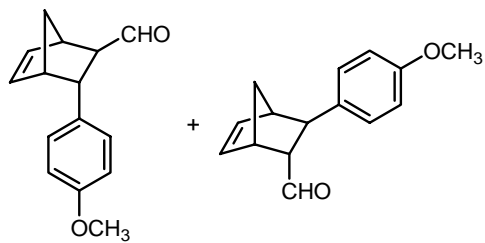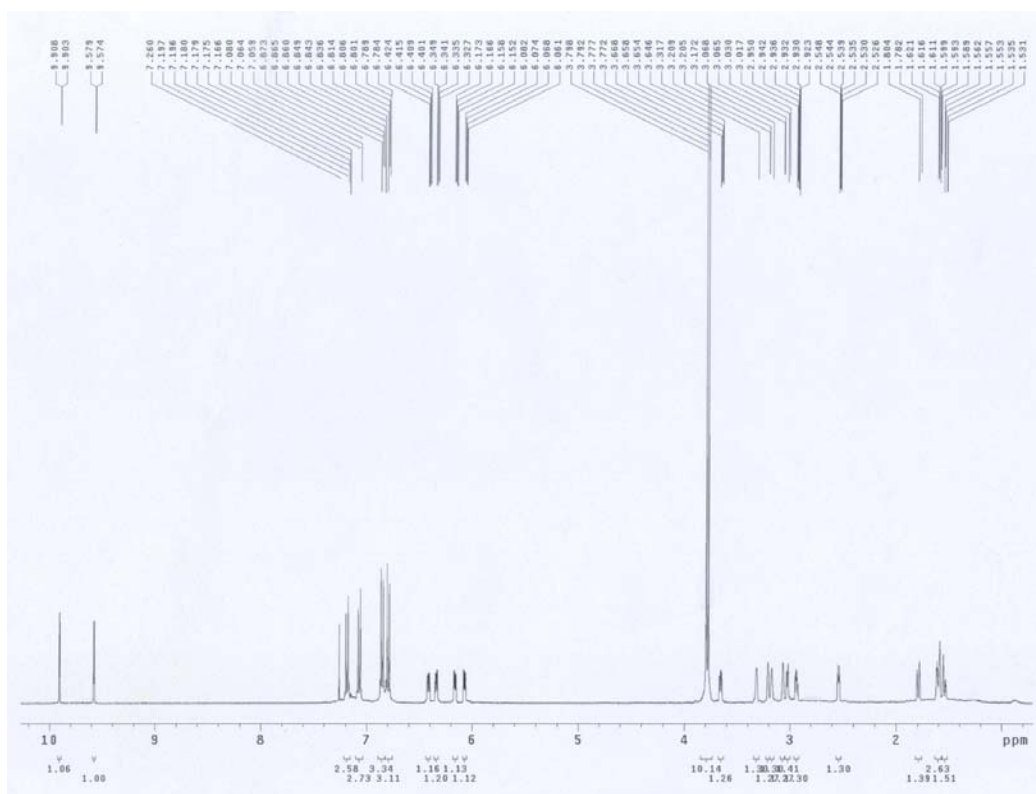

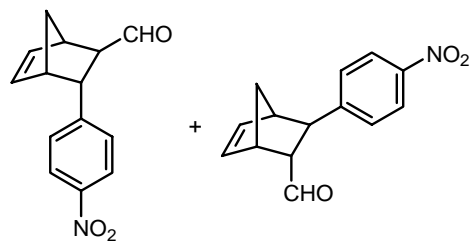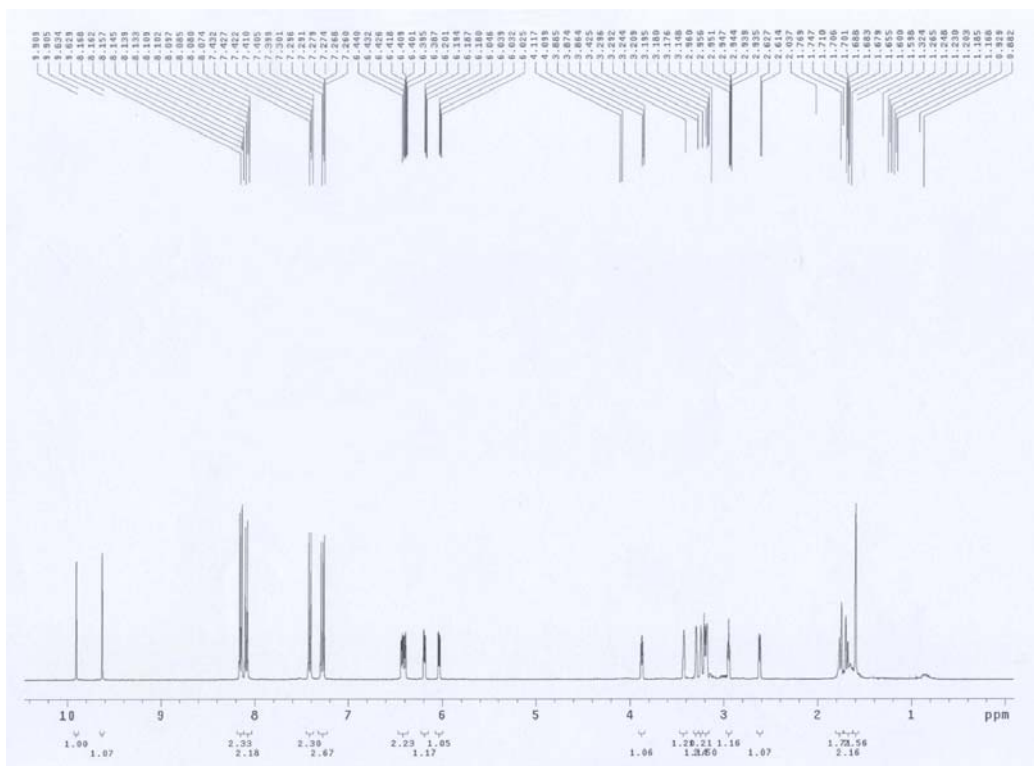

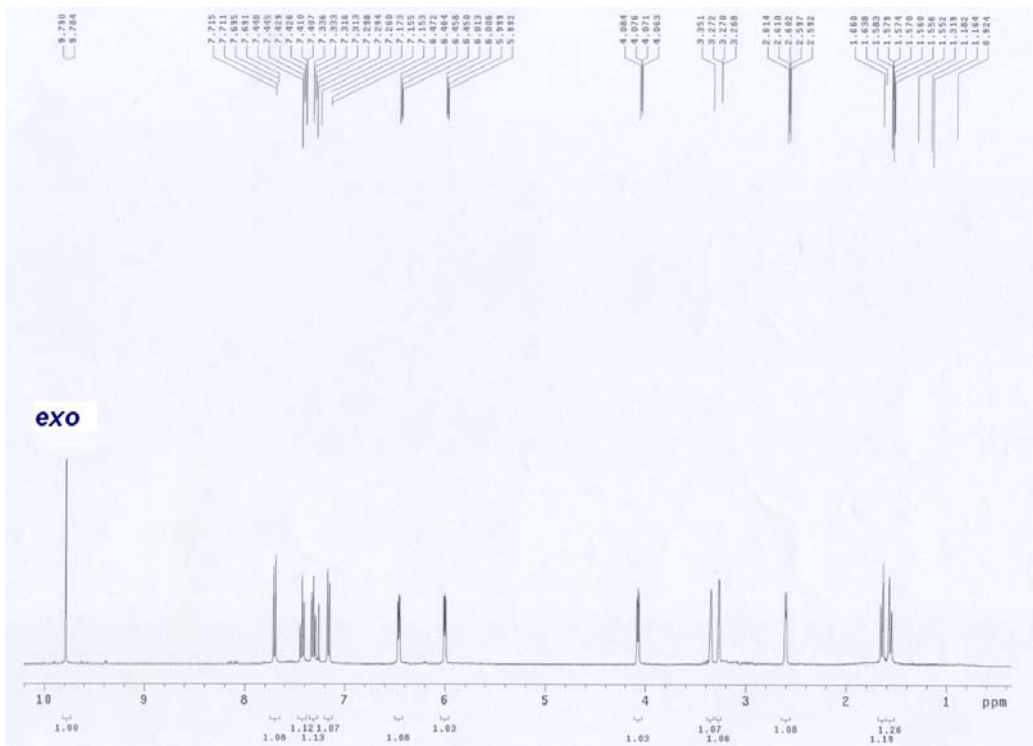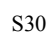

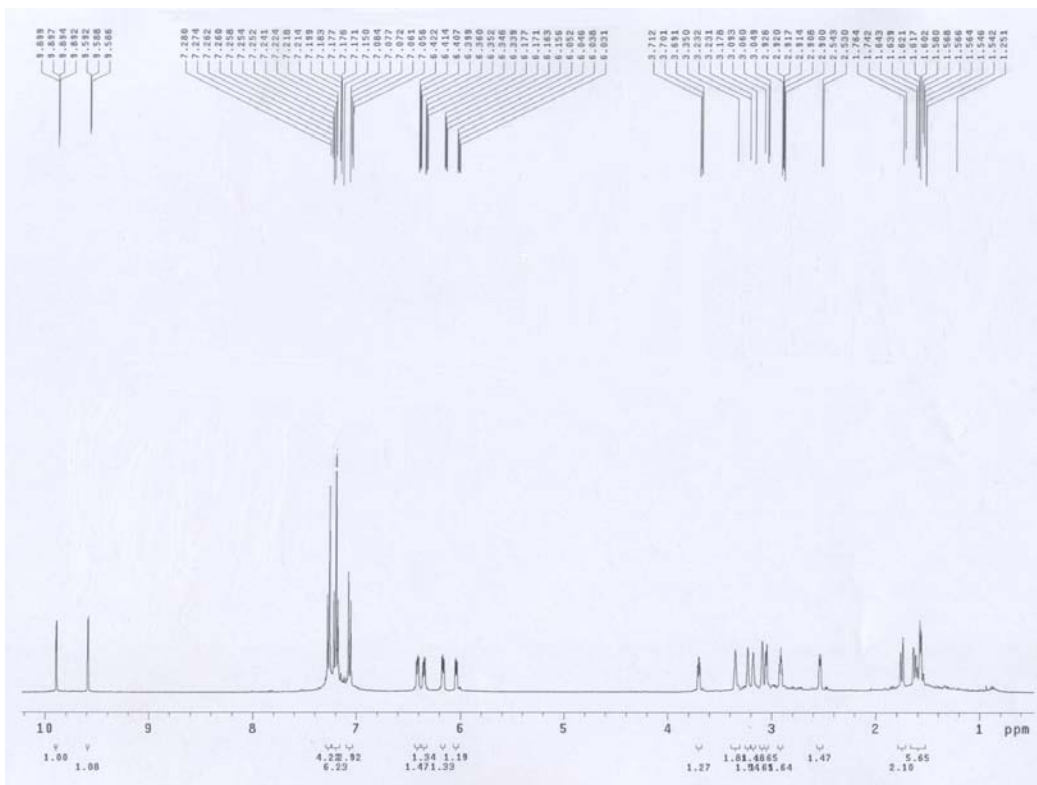

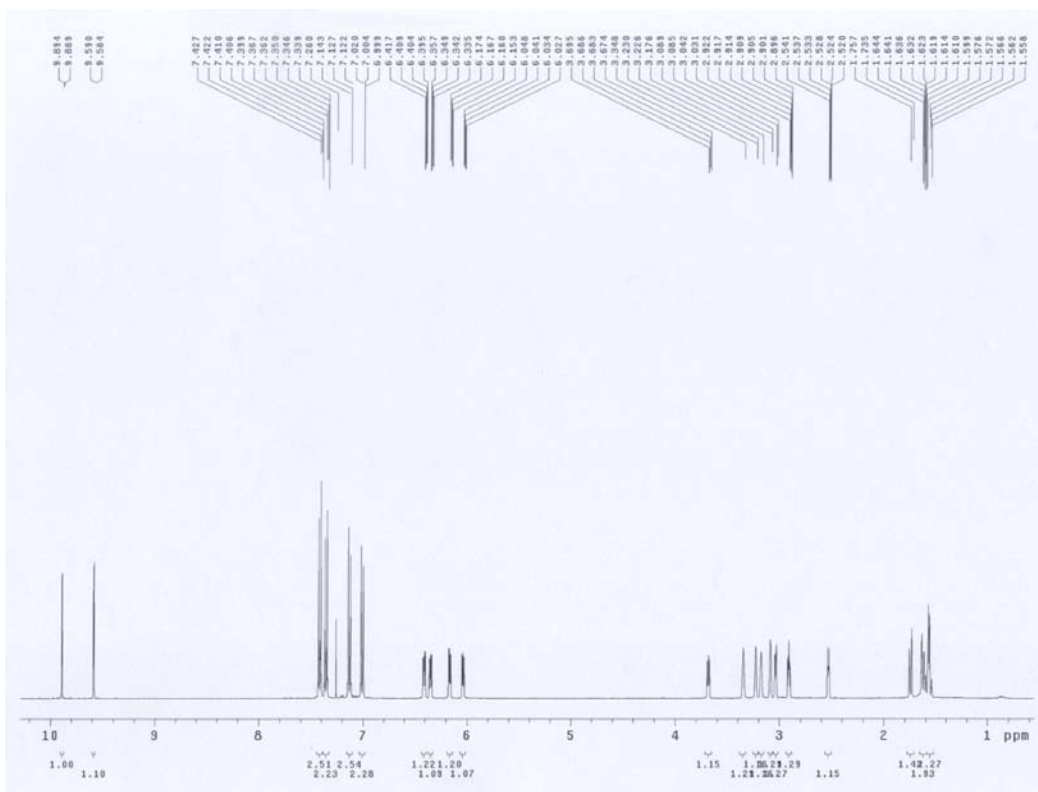

Supplement: Supplementary file 1 [file 4631542]
